# Supplementary material for: Phytochrome diversity in green plants and the origin of canonical plant phytochromes
Source: PubMed Central journal article supplement (PMC4525182; doi:10.1038/ncomms8852), 2015-07-28
Supplement: ncomms8852-s1.pdf [file ncomms8852-s1.pdf]

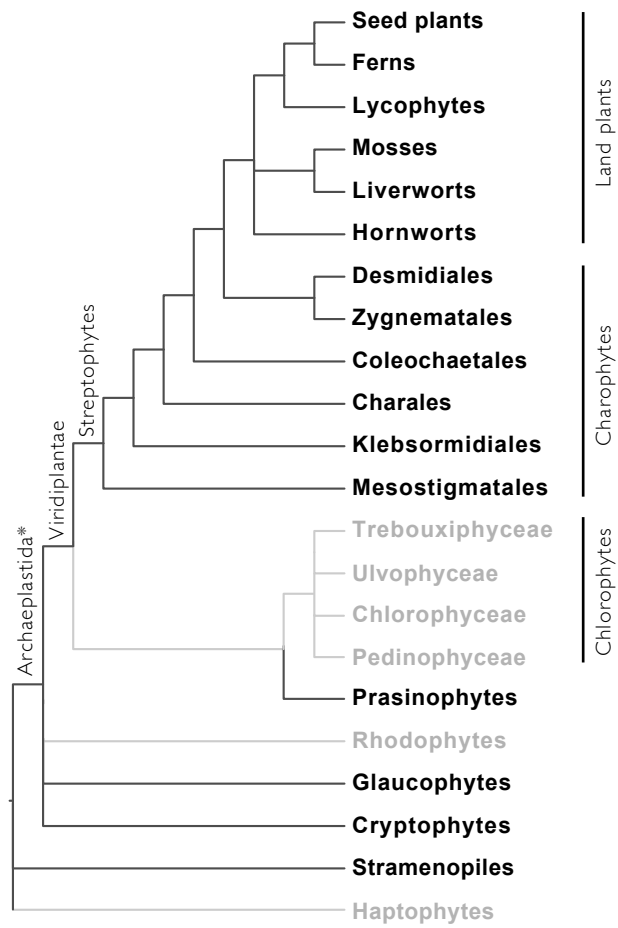

**Supplementary Figure 1.** The organismal lineages screened for phytochrome homologs. Phytochromes were not detected in lineages indicated in grey. \*Traditional Archaeplastida does not include cryptophytes.

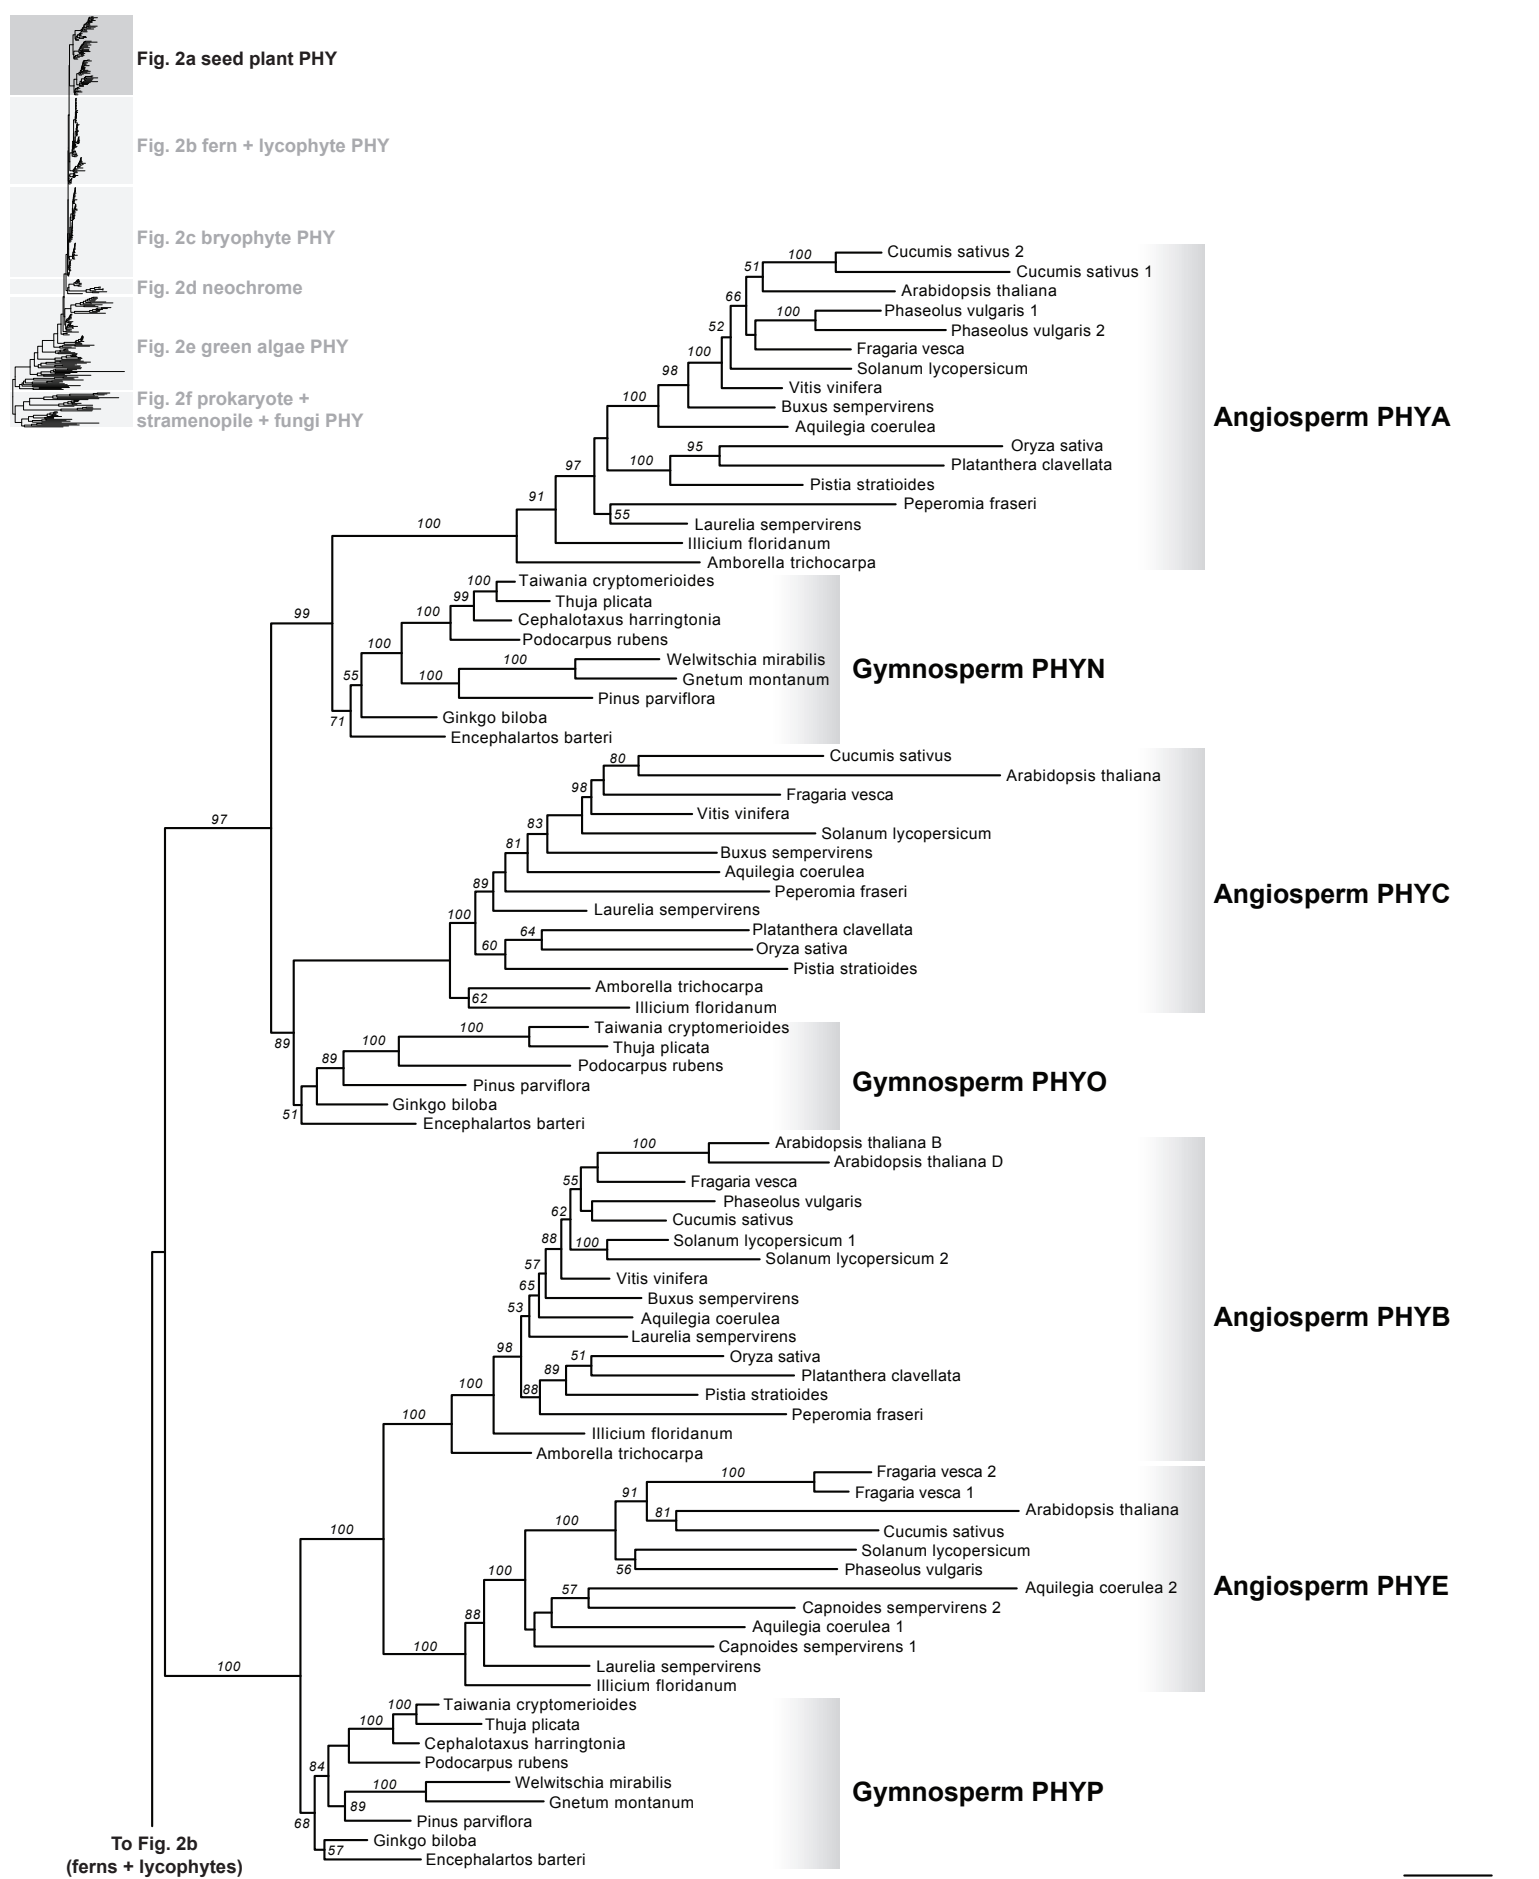

**Supplementary Figure 2.** The phylogeny of phytochromes reconstructed from 423 protein sequences. Topology derived from the best maximum likelihood tree. The values associated with branches are maximum likelihood bootstrap support. For better visualization, the complete tree is broken down into six subtrees (a-f) and scaled differently. The inset at the top-left corner shows the map to each subtree. **(a)** The seed plant phytochrome subtree. Phylogeny continues in Supplementary Fig. 2b.

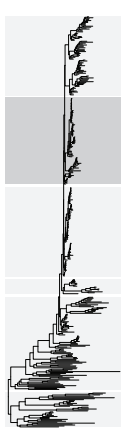

Fig. 2a seed plant PHY

Fig. 2b fern + lycophyte PHY

Fig. 2c bryophyte PHY

Fig. 2d neochrome

Fig. 2e green algae PHY

Fig. 2f prokaryote + stramenopile + fungi PHY

To Fig. 2a  
(Seed plants)

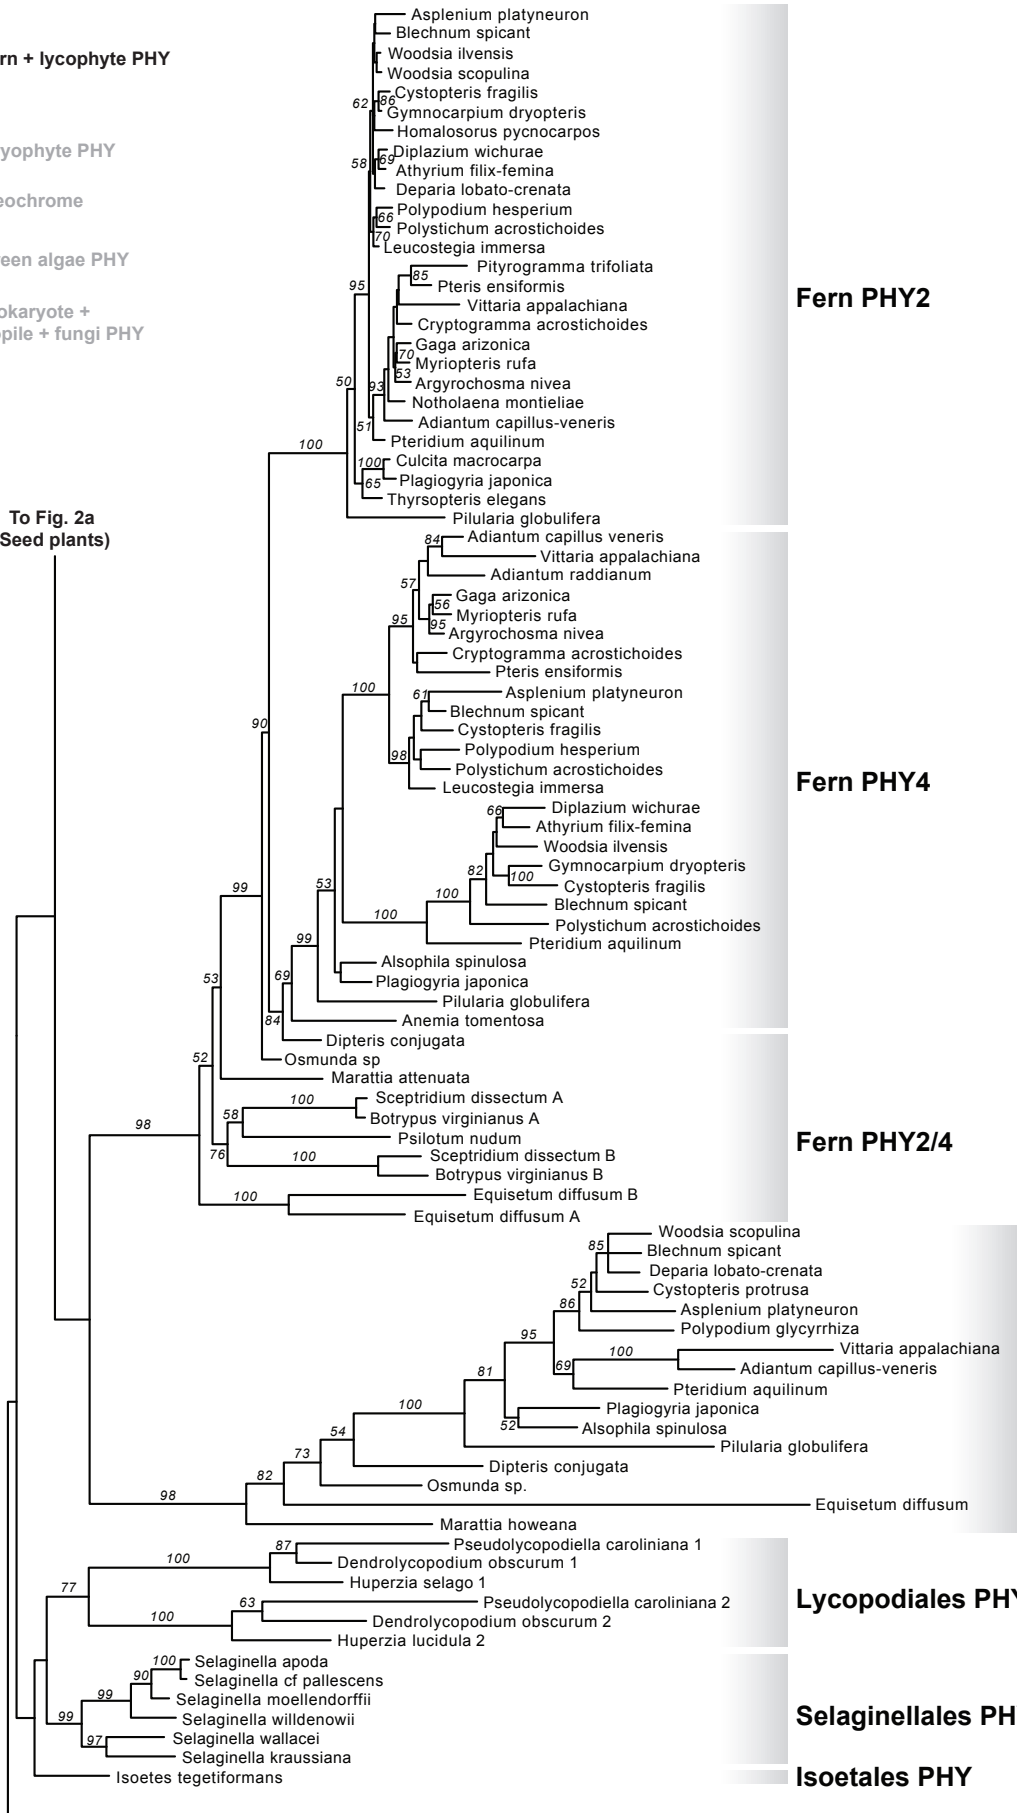

To Fig. 1c  
(bryophytes)

0.1 substitutions/site

**Supplementary Figure 2. (b)** The fern and lycophyte phytochrome subtree. Phylogeny continues in Supplementary Fig. 2a,c. See Fig. 5 for a more extensively sampled and higher resolution phylogeny that was reconstructed from nucleotide dataset.

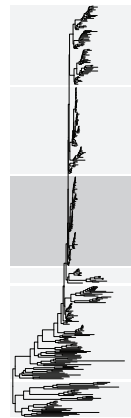

Fig. 2a seed plant PHY

Fig. 2b fern + lycophyte PHY

Fig. 2c bryophyte PHY

Fig. 2d neochrome

Fig. 2e green algae PHY

Fig. 2f prokaryote + stramenopile + fungi PHY

To Fig. 2b  
(ferns + lycophytes)

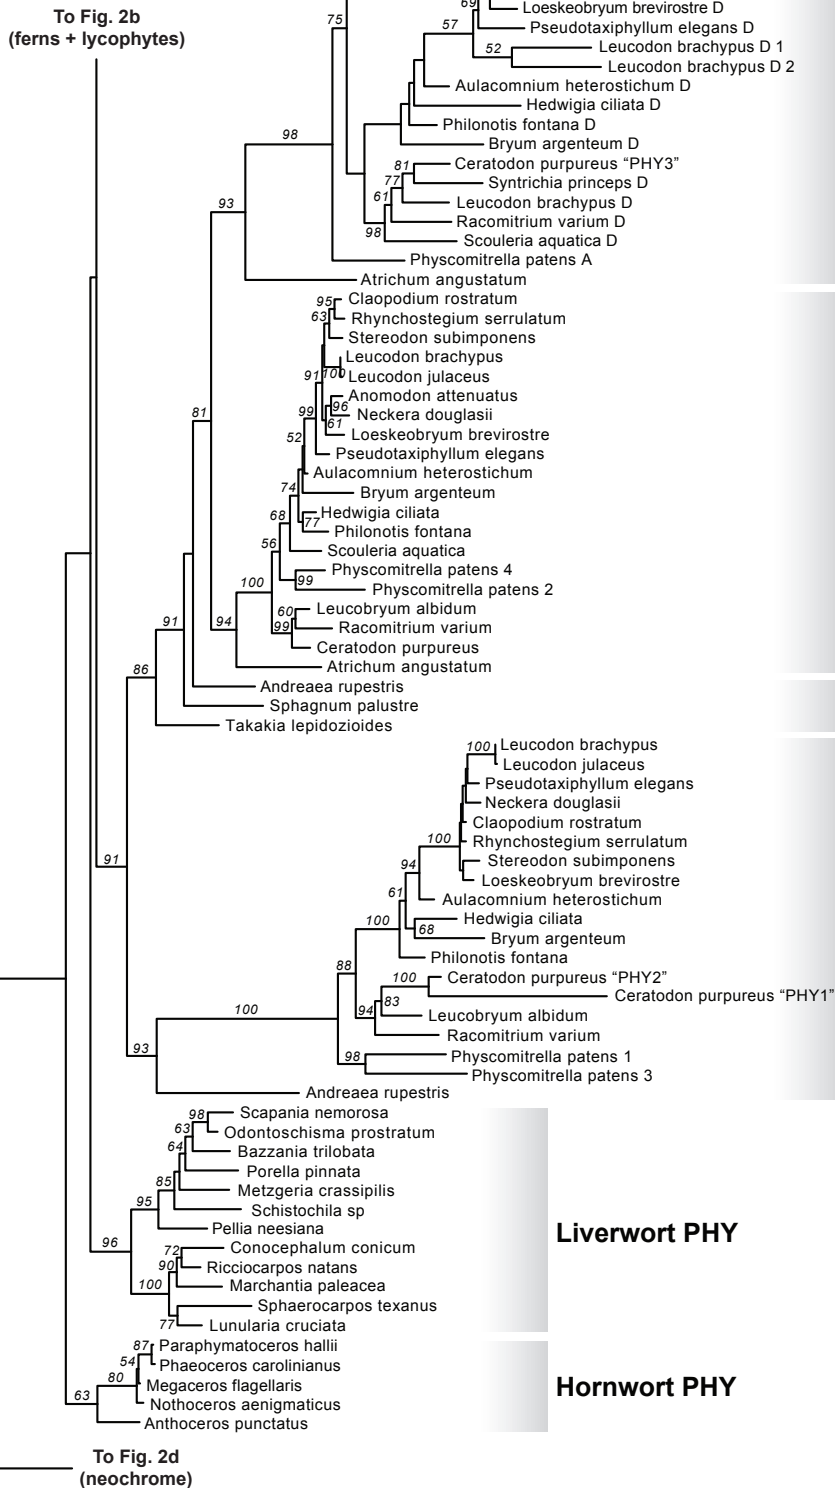

Moss PHY5

Moss PHY2\_4

Moss PHY2\_4/5

Moss PHY1\_3

Liverwort PHY

Hornwort PHY

To Fig. 2d  
(neochrome)

To Fig. 2e  
(green algae)

0.1 substitutions/site

**Supplementary Figure 2. (c)** The bryophyte phytochrome subtree. Phylogeny continues in Supplementary Fig. 2b,d,e. See Fig. 4 for a more extensively sampled and higher resolution phylogeny that was reconstructed from nucleotide dataset.

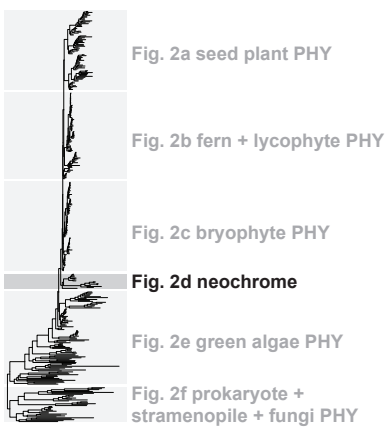

Fig. 2a seed plant PHY

Fig. 2b fern + lycophyte PHY

Fig. 2c bryophyte PHY

**Fig. 2d neochrome**

Fig. 2e green algae PHY

Fig. 2f prokaryote + stramenopile + fungi PHY

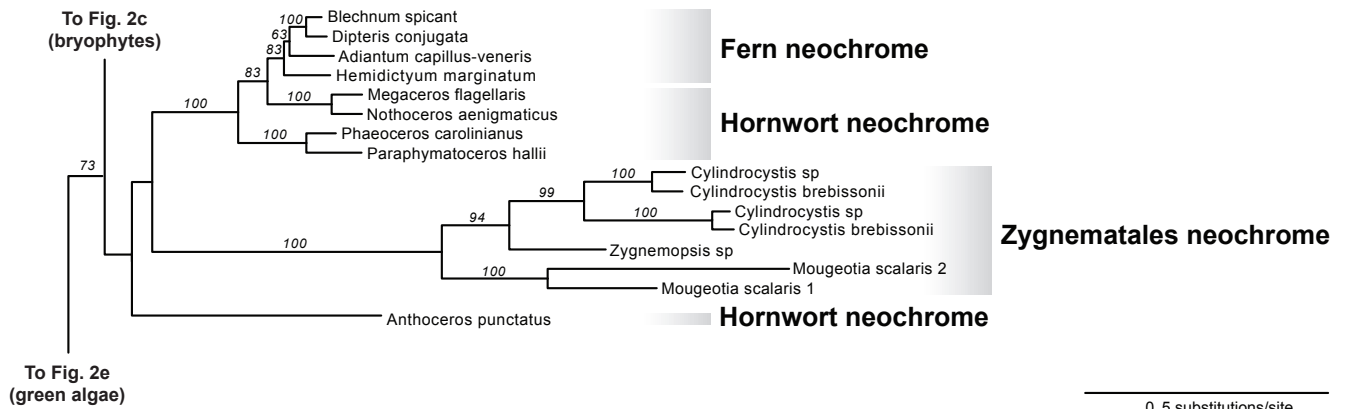

**Supplementary Figure 2. (d)** The neochrome subtree. Phylogeny continues in Supplementary Fig. 2c,e. See Fig. 3 for a more extensively sampled and higher resolution phylogeny.

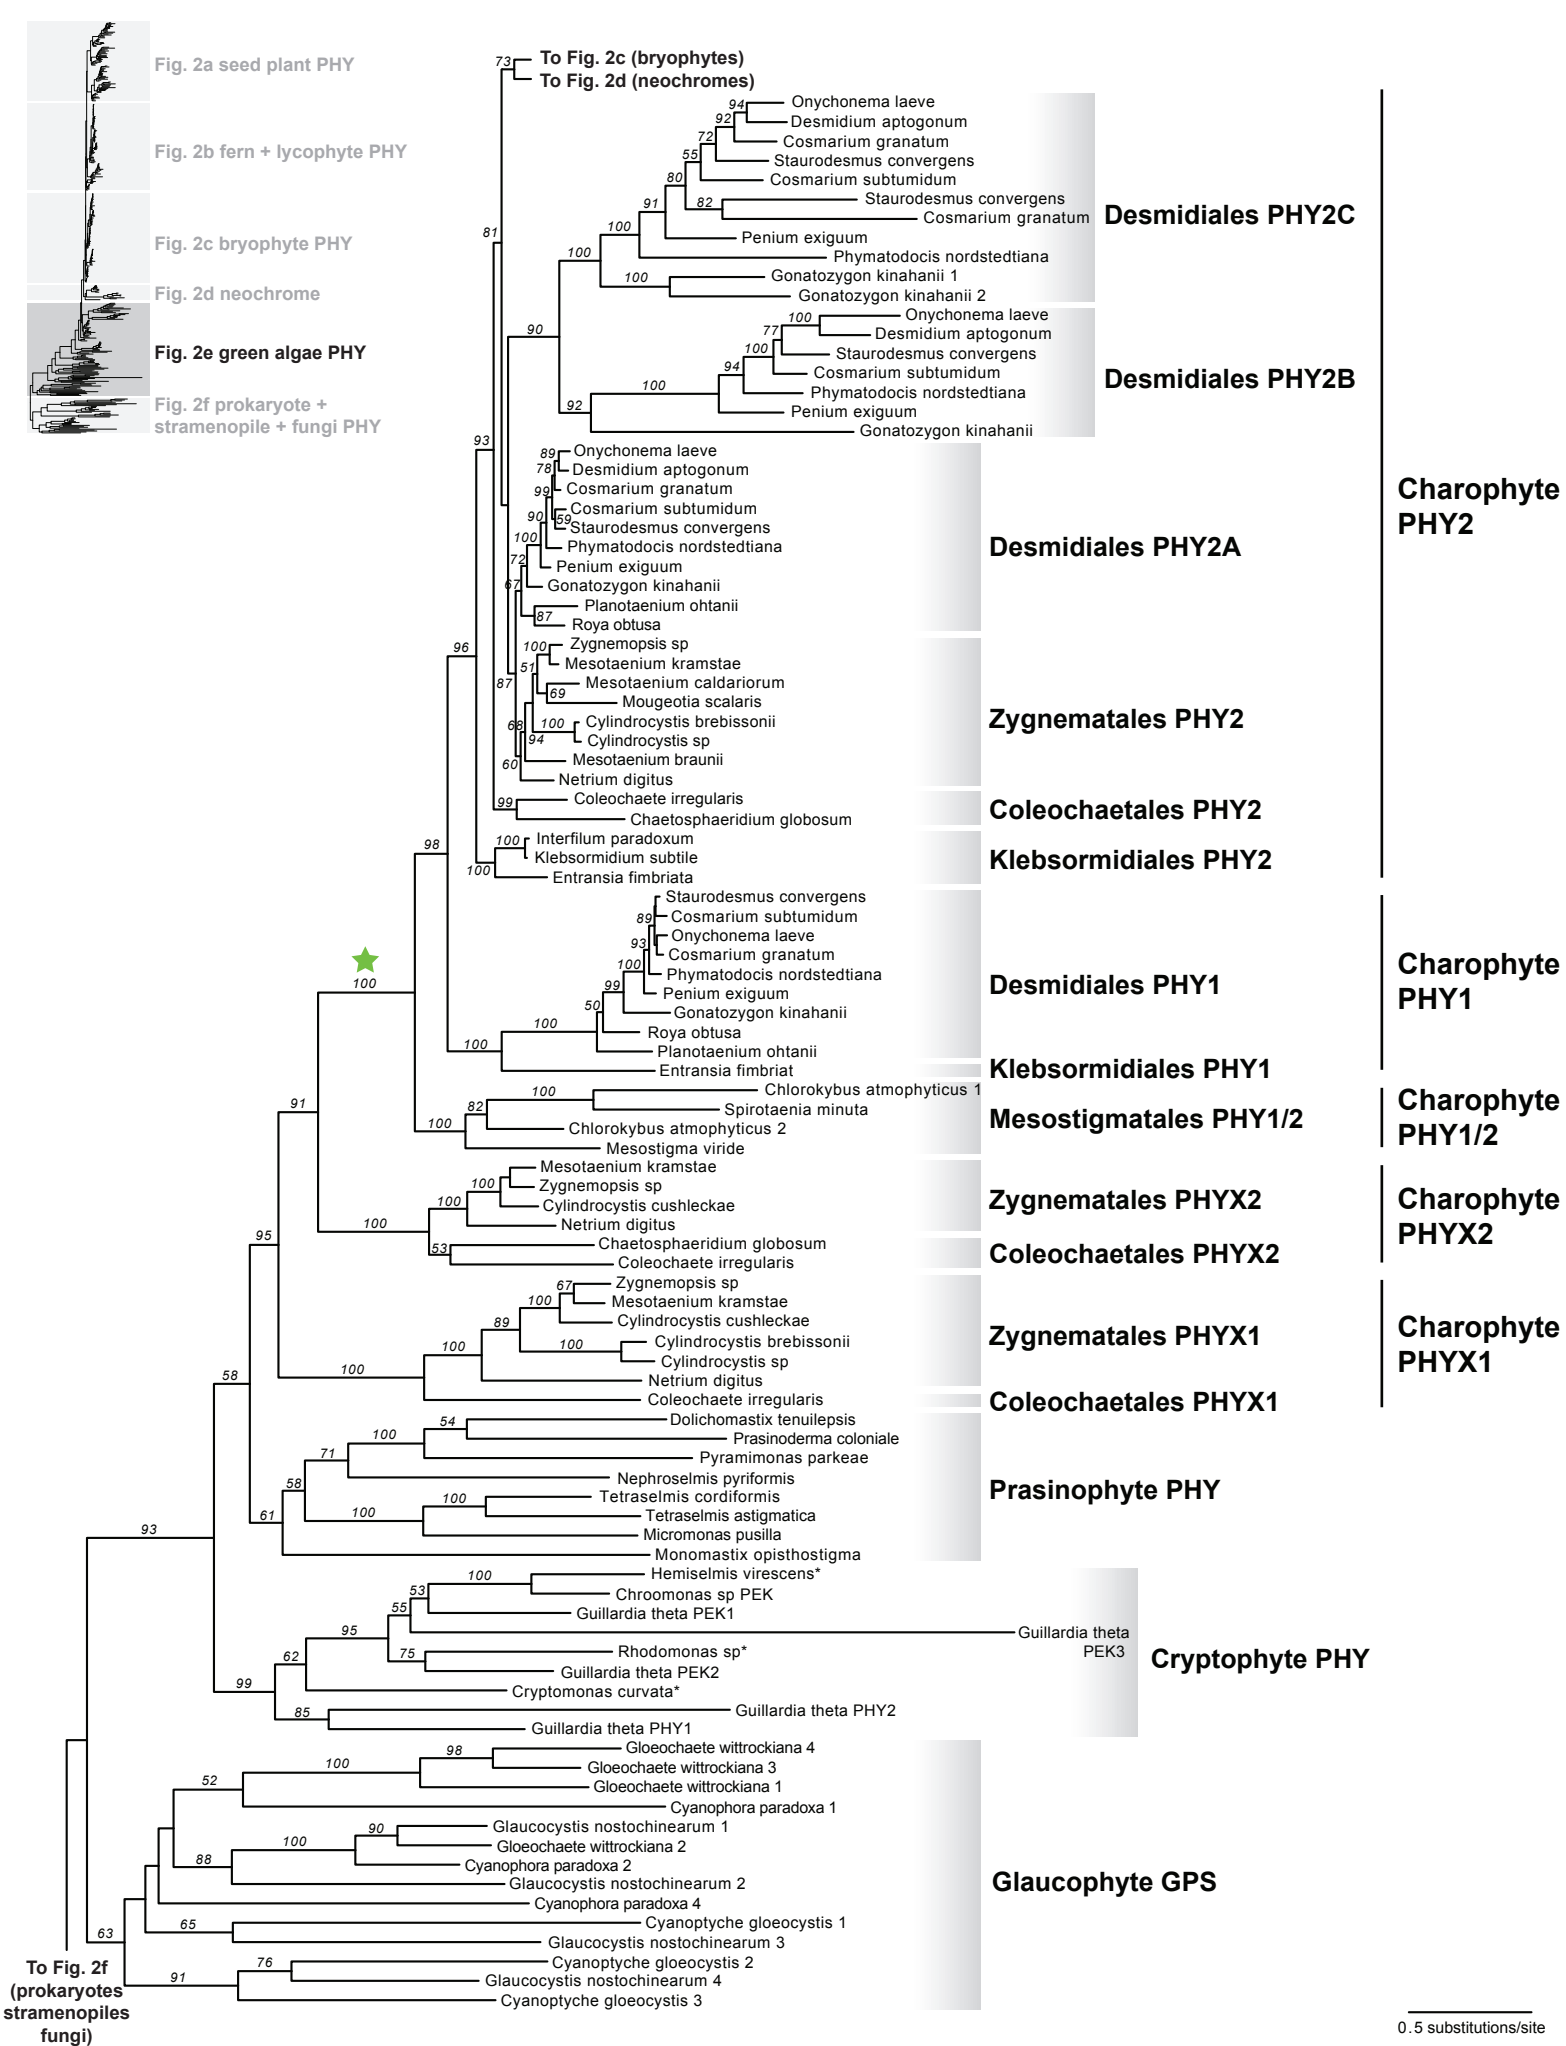

**Supplementary Figure 2. (e)** The green algae phytochrome subtree. Green star marks the origin of canonical plant phytochrome. Phylogeny continues in Supplementary Fig. 2c,d,f. “\*” marks the cryptophyte phytochromes that have incomplete C-terminal end, so that they cannot be determined as PEK or not.

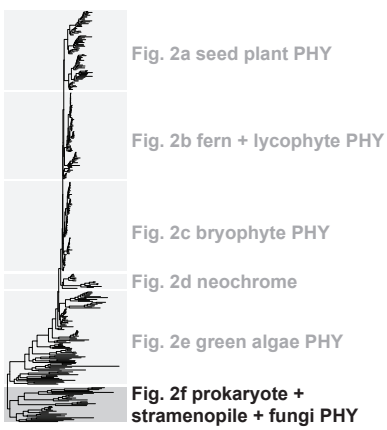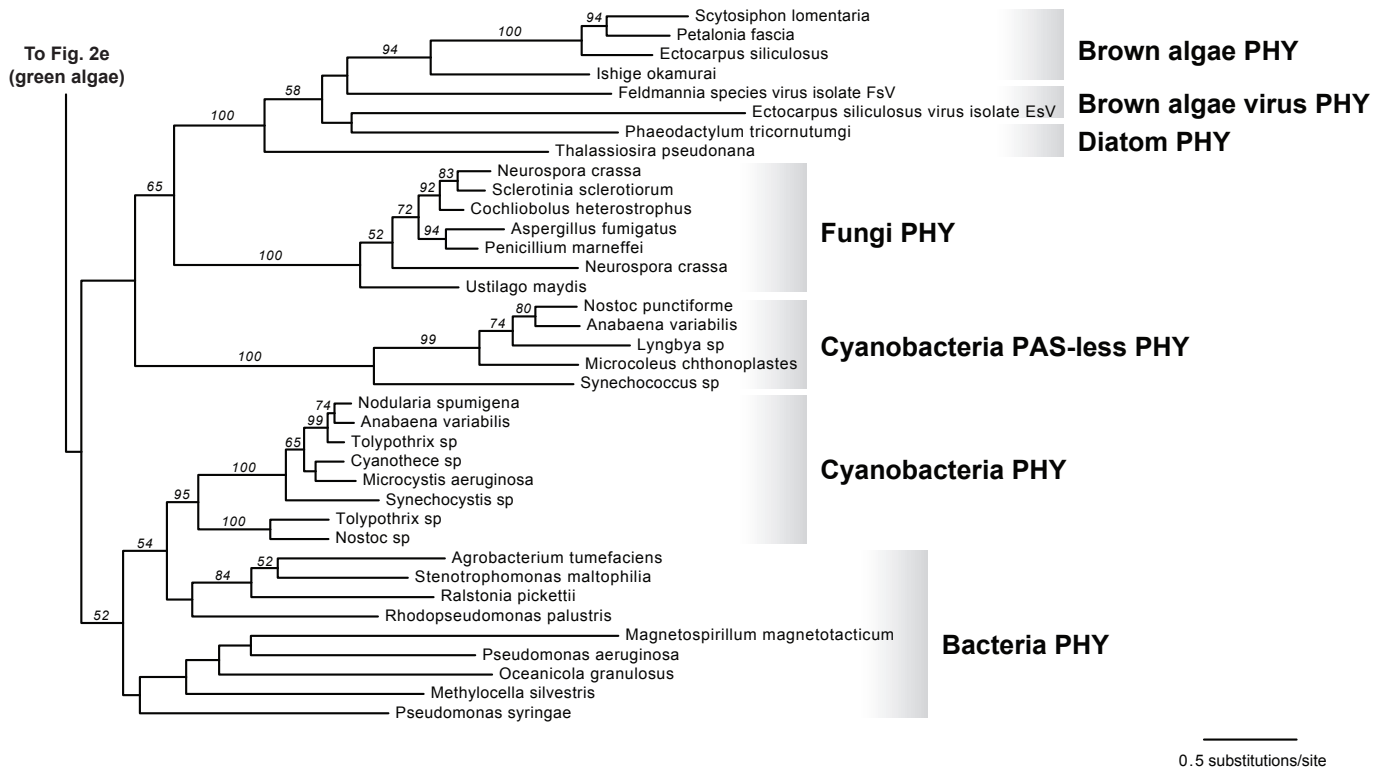

**Supplementary Figure 2. (f)** The prokaryote + stramenopile + fungi phytochrome subtree. Phylogeny continues in Supplementary Fig. 2e.

**Supplementary Table 1.** List of transcriptomes and genomes screened for phytochrome homologs. "-": not applicable.

| Taxa                              | Source                                        | 1KP <sup>3</sup> identifier |
|-----------------------------------|-----------------------------------------------|-----------------------------|
| <b>Angiosperm</b>                 |                                               |                             |
| <i>Amborella trichocarpa</i>      | Genome, Amborella Genome Project <sup>1</sup> | -                           |
| <i>Aquilegia coerulea</i>         | Genome, Phytozome <sup>2</sup>                | -                           |
| <i>Arabidopsis thaliana</i>       | Genome, Phytozome                             | -                           |
| <i>Buxus sempervirens</i>         | Transcriptome, 1KP <sup>3</sup>               | IWMW                        |
| <i>Capnoides sempervirens</i>     | Transcriptome, 1KP                            | AUGV                        |
| <i>Cucumis sativus</i>            | Genome, Phytozome                             | -                           |
| <i>Fragaria vesca</i>             | Genome, Phytozome                             | -                           |
| <i>Illicium floridanum</i>        | Transcriptome, 1KP                            | VZCI                        |
| <i>Laurelia sempervirens</i>      | Transcriptome, 1KP                            | WAIL                        |
| <i>Oryza sativa</i>               | Genome, Phytozome                             | -                           |
| <i>Peperomia fraseri</i>          | Transcriptome, 1KP                            | XSZI                        |
| <i>Phaseolus vulgaris</i>         | Genome, Phytozome                             | -                           |
| <i>Pistia stratioides</i>         | Transcriptome, 1KP                            | MFIN                        |
| <i>Platanthera clavellata</i>     | Transcriptome, 1KP                            | MTHW                        |
| <i>Solanum lycopersicum</i>       | Genome, Phytozome                             | -                           |
| <i>Vitis vinifera</i>             | Genome, Phytozome                             | -                           |
| <b>Gymnosperm</b>                 |                                               |                             |
| <i>Cephalotaxus harringtonia</i>  | Transcriptome, 1KP                            | WYAJ                        |
| <i>Encephalartos barteri</i>      | Transcriptome, 1KP                            | GNQG                        |
| <i>Ginkgo biloba</i>              | Transcriptome, 1KP                            | SGTW                        |
| <i>Gnetum montanum</i>            | Transcriptome, 1KP                            | GTHK                        |
| <i>Pinus parviflora</i>           | Transcriptome, 1KP                            | IIOL                        |
| <i>Podocarpus rubens</i>          | Transcriptome, 1KP                            | XLGK                        |
| <i>Taiwania cryptomerioides</i>   | Transcriptome, 1KP                            | QSNJ                        |
| <i>Thuja plicata</i>              | Transcriptome, 1KP                            | VFYZ                        |
| <i>Welwitschia mirabilis</i>      | Transcriptome, 1KP                            | TOXE                        |
| <b>Fern</b>                       |                                               |                             |
| <i>Adiantum tenerum</i>           | Transcriptome, 1KP                            | BMJR                        |
| <i>Anemia tomentosa</i>           | Transcriptome, 1KP                            | CQPW                        |
| <i>Argyroschisma nivea</i>        | Transcriptome, 1KP                            | XDDT                        |
| <i>Asplenium platyneuron</i>      | Transcriptome, 1KP                            | KJZG                        |
| <i>Athyrium filix-femina</i>      | Transcriptome, 1KP                            | AFPO                        |
| <i>Azolla caroliniana</i>         | Transcriptome, 1KP                            | CVEG                        |
| <i>Azolla filiculoides</i>        | Transcriptome, Brouwer et al. <sup>4</sup>    | -                           |
| <i>Blechnum spicant</i>           | Transcriptome, 1KP                            | VITX                        |
| <i>Botrypus virginianus</i>       | Transcriptome, 1KP                            | BEGM                        |
| <i>Ceratopteris thalictroides</i> | Transcriptome, 1KP                            | PIVW                        |
| <i>Gaga arizonica</i>             | Transcriptome, 1KP                            | DCDT                        |



|                                    |                                        |      |
|------------------------------------|----------------------------------------|------|
| <i>Cryptogramma acrostichoides</i> | Transcriptome, 1KP                     | WQML |
| <i>Culcita macrocarpa</i>          | Transcriptome, 1KP                     | PNZO |
| <i>Alsophila spinulosa</i>         | Transcriptome, 1KP                     | GANB |
| <i>Cystopteris fragilis</i>        | Transcriptome, 1KP                     | LHLE |
| <i>Cystopteris protrusa</i>        | Transcriptome, 1KP                     | YOWV |
| <i>Danaea nodosa</i>               | Transcriptome, 1KP                     | DFHO |
| <i>Deparia lobato-crenata</i>      | Transcriptome, 1KP                     | FCHS |
| <i>Diplazium wichurae</i>          | Transcriptome, 1KP                     | UFJN |
| <i>Dipteris conjugata</i>          | Transcriptome, 1KP                     | MEKP |
| <i>Equisetum diffusum</i>          | Transcriptome, 1KP                     | CAPN |
| <i>Gymnocarpium dryopteris</i>     | Transcriptome, 1KP                     | HEGQ |
| <i>Homalosorus pycnocarpus</i>     | Transcriptome, 1KP                     | OCZL |
| <i>Leucostegia immersa</i>         | Transcriptome, 1KP                     | WGTU |
| <i>Lindsaea microphylla</i>        | Transcriptome, 1KP                     | YIXP |
| <i>Lonchitis hirsuta</i>           | Transcriptome, 1KP                     | VVRN |
| <i>Lygodium japonicum</i>          | Transcriptome, 1KP                     | PBUU |
| <i>Marattia attenuata</i>          | Transcriptome, 1KP                     | UGNK |
| <i>Myriopteris rufa</i>            | Transcriptome, 1KP                     | GSXD |
| <i>Notholaena montieliae</i>       | Transcriptome, 1KP                     | YCKE |
| <i>Osmunda javanica</i>            | Transcriptome, 1KP                     | VIBO |
| <i>Osmunda sp</i>                  | Transcriptome, 1KP                     | UOMY |
| <i>Osmundastrum cinnamomeum</i>    | Transcriptome, 1KP                     | RFMZ |
| <i>Pilularia globulifera</i>       | Transcriptome, 1KP                     | KIIX |
| <i>Pityrogramma trifoliata</i>     | Transcriptome, 1KP                     | UJTT |
| <i>Plagiogyria japonica</i>        | Transcriptome, 1KP                     | UWOD |
| <i>Polypodium glycyrrhiza</i>      | Transcriptome, 1KP                     | CJNT |
| <i>Polypodium hesperium</i>        | Transcriptome, 1KP                     | GYFU |
| <i>Polystichum acrostichoides</i>  | Transcriptome, 1KP                     | FQGQ |
| <i>Pteridium aquilinum</i>         | Transcriptome, Der et al. <sup>5</sup> | -    |
| <i>Pteris ensiformis</i>           | Transcriptome, 1KP                     | FLTD |
| <i>Sceptridium dissectum</i>       | Transcriptome, 1KP                     | EEAQ |
| <i>Thyrsopteris elegans</i>        | Transcriptome, 1KP                     | EWXK |
| <i>Vittaria appalachiana</i>       | Transcriptome, 1KP                     | NDUV |
| <i>Woodsia ilvensis</i>            | Transcriptome, 1KP                     | YQEC |
| <i>Woodsia scopulina</i>           | Transcriptome, 1KP                     | YJJY |
| <b>Isoetopsida</b>                 |                                        |      |
| <i>Selaginella cf pallescens</i>   | Transcriptome, 1KP                     | ABIJ |
| <i>Selaginella moellendorffii</i>  | Genome, Phytozome                      | -    |
| <i>Selaginella willdenowii</i>     | Transcriptome, 1KP                     | KJYC |
| <i>Selaginella kraussiana</i>      | Transcriptome, 1KP                     | ZFGK |
| <i>Selaginella wallacei</i>        | Transcriptome, 1KP                     | JKAA |
| <i>Selaginella apoda</i>           | Transcriptome, 1KP                     | LGDQ |

|                                |                    |      |
|--------------------------------|--------------------|------|
| Isoetes tegetiformans          | Transcriptome, 1KP | PKOX |
| <b>Lycopodiales</b>            |                    |      |
| Dendrolycopodium obscurum      | Transcriptome, 1KP | XNXF |
| Huperzia selago                | Transcriptome, 1KP | GTUO |
| Huperzia lucidula              | Transcriptome, 1KP | GKAG |
| Pseudolycopodiella caroliniana | Transcriptome, 1KP | UPMJ |
| <b>Moss</b>                    |                    |      |
| Andreaea rupestris             | Transcriptome, 1KP | WOGB |
| Anomodon attenuatus            | Transcriptome, 1KP | QMWB |
| Claopodium rostratum           | Transcriptome, 1KP | VBMM |
| Atrichum angustatum            | Transcriptome, 1KP | ZTHV |
| Aulacomnium heterostichum      | Transcriptome, 1KP | WNGH |
| Bryum argenteum                | Transcriptome, 1KP | JMXW |
| Ceratodon purpureus            | Transcriptome, 1KP | FFPD |
| Hedwigia ciliata               | Transcriptome, 1KP | YWNF |
| Stereodon subimponens          | Transcriptome, 1KP | LNSF |
| Leucobryum albidum             | Transcriptome, 1KP | VMXJ |
| Leucodon brachypus             | Transcriptome, 1KP | ZACW |
| Neckera douglasii              | Transcriptome, 1KP | TMAJ |
| Philonotis fontana             | Transcriptome, 1KP | ORKS |
| Physcomitrella patens          | Genome, Phytozome  | -    |
| Pseudotaxiphyllum elegans      | Transcriptome, 1KP | QKQO |
| Racomitrium varium             | Transcriptome, 1KP | RDOO |
| Rhynchostegium serrulatum      | Transcriptome, 1KP | JADL |
| Loeskeobryum brevirostre       | Transcriptome, 1KP | WSPM |
| Leucodon julaceus              | Transcriptome, 1KP | IGUH |
| Scouleria aquatica             | Transcriptome, 1KP | BPSG |
| Sphagnum palustre              | Transcriptome, 1KP | RCBT |
| Syntrichia princeps            | Transcriptome, 1KP | GRKU |
| Takakia lepidozoides           | Transcriptome, 1KP | SKQD |
| <b>Liverwort</b>               |                    |      |
| Scapania nemorosa              | Transcriptome, 1KP | IRBN |
| Porella pinnata                | Transcriptome, 1KP | UUHD |
| Schistochila sp                | Transcriptome, 1KP | LGOW |
| Metzgeria crassipilis          | Transcriptome, 1KP | NRWZ |
| Pellia neesiana                | Transcriptome, 1KP | JHFI |
| Odontoschisma prostratum       | Transcriptome, 1KP | YBQN |
| Conocephalum conicum           | Transcriptome, 1KP | ILBQ |
| Lunularia cruciata             | Transcriptome, 1KP | TXVB |
| Sphaerocarpos texanus          | Transcriptome, 1KP | HERT |
| Ricciocarpos natans            | Transcriptome, 1KP | WJLO |
| Bazzania trilobata             | Transcriptome, 1KP | WZYK |

**Hornwort**

|                          |                                |      |
|--------------------------|--------------------------------|------|
| Nothoceros aenigmaticus  | Transcriptome, 1KP             | DXOU |
| Megaceros flagellaris    | Transcriptome, 1KP             | UCRN |
| Paraphymatoceros hallii  | Transcriptome, 1KP             | FAJB |
| Phaeoceros carolinianus  | Transcriptome, 1KP             | WCZB |
| Anthoceros punctatus     | Genome, Li et al. <sup>6</sup> | -    |
| Phaeomegaceros coriaceus | Transcriptome, 1KP             | AKXB |
| Leiosporoceros dussii    | Transcriptome, 1KP             | ANON |

**Desmidiiales**

|                            |                    |      |
|----------------------------|--------------------|------|
| Cosmarium granatum         | Transcriptome, 1KP | MNNM |
| Cosmarium subtumidum       | Transcriptome, 1KP | WDGV |
| Desmidium aptogonum        | Transcriptome, 1KP | DFDS |
| Gonatozygon kinahanii      | Transcriptome, 1KP | KEYW |
| Onychonema laeve           | Transcriptome, 1KP | GGWH |
| Penium exiguum             | Transcriptome, 1KP | YSQT |
| Phymatodocis nordstedtiana | Transcriptome, 1KP | RPQV |
| Planotaenium ohtanii       | Transcriptome, 1KP | SNOX |
| Roya obtusa                | Transcriptome, 1KP | XRTZ |
| Staurodesmus convergens    | Transcriptome, 1KP | WCQU |

**Zygnematales**

|                            |                    |      |
|----------------------------|--------------------|------|
| Cylindrocystis brebissonii | Transcriptome, 1KP | YOXI |
| Cylindrocystis cushleckae  | Transcriptome, 1KP | JOJQ |
| Cylindrocystis sp          | Transcriptome, 1KP | VAZE |
| Mesotaenium braunii        | Transcriptome, 1KP | WSJO |
| Mesotaenium kramstae       | Transcriptome, 1KP | NBYP |
| Netrium digitus            | Transcriptome, 1KP | FFGR |
| Zygnemopsis sp             | Transcriptome, 1KP | MFZO |

**Coleochaetales**

|                            |                    |      |
|----------------------------|--------------------|------|
| Coleochaete irregularis    | Transcriptome, 1KP | QPDY |
| Chaetosphaeridium globosum | Transcriptome, 1KP | DRGY |

**Klebsormidiales**

|                       |                    |      |
|-----------------------|--------------------|------|
| Interfilum paradoxum  | Transcriptome, 1KP | FPCO |
| Klebsormidium subtile | Transcriptome, 1KP | FQLP |
| Entransia fimbriata   | Transcriptome, 1KP | BFIK |

**Mesostigmatales**

|                          |                    |      |
|--------------------------|--------------------|------|
| Chlorokybus atmophyticus | Transcriptome, 1KP | AZZW |
| Mesostigma viride        | Transcriptome, 1KP | KYIO |
| Spirotaenia minuta       | Transcriptome, 1KP | NNHQ |

**Charales**

|                |                    |      |
|----------------|--------------------|------|
| Chara vulgaris | Transcriptome, 1KP | MWXT |
|----------------|--------------------|------|

**Trebouxiophyceae**

|                      |                    |      |
|----------------------|--------------------|------|
| Botryococcus braunii | Transcriptome, 1KP | ETGN |
|----------------------|--------------------|------|

|                                   |                    |      |
|-----------------------------------|--------------------|------|
| <i>Botryococcus terribilis</i>    | Transcriptome, 1KP | QYXY |
| <i>Coccomyxa pringsheimii</i>     | Transcriptome, 1KP | GXBM |
| <i>Eremosphaera viridis</i>       | Transcriptome, 1KP | MNCB |
| <i>Geminella</i> sp.              | Transcriptome, 1KP | PFUD |
| <i>Leptosira obovata</i>          | Transcriptome, 1KP | ZNUM |
| <i>Microthamnion kuetzigianum</i> | Transcriptome, 1KP | DXNY |
| <i>Nannochloris atomus</i>        | Transcriptome, 1KP | MFYC |
| <i>Neochloris oleoabundans</i>    | Transcriptome, 1KP | EEJO |
| <i>Parachlorella kessleri</i>     | Transcriptome, 1KP | AKCR |
| <i>Prasiola crispa</i>            | Transcriptome, 1KP | WCLV |
| <i>Prototheca wickerhamii</i>     | Transcriptome, 1KP | BILC |
| <i>Stichococcus bacillaris</i>    | Transcriptome, 1KP | WXRI |
| <i>Trebouxia arboricola</i>       | Transcriptome, 1KP | NKXU |

### **Ulvophyceae**

|                                        |                    |      |
|----------------------------------------|--------------------|------|
| <i>Acrosiphonia</i> sp.                | Transcriptome, 1KP | JIWJ |
| <i>Blastophysa</i> cf. <i>rhizopus</i> | Transcriptome, 1KP | VHIJ |
| <i>Bolbocoleon piliferum</i>           | Transcriptome, 1KP | LSHT |
| <i>Bryopsis plumosa</i>                | Transcriptome, 1KP | JTIG |
| <i>Cephaleuros virescens</i>           | Transcriptome, 1KP | YDCQ |
| <i>Cladophora glomerata</i>            | Transcriptome, 1KP | VBLH |
| <i>Codium fragile</i>                  | Transcriptome, 1KP | GYBH |
| <i>Desmochloris halophila</i>          | Transcriptome, 1KP | KSFK |
| <i>Entocladia endozoica</i>            | Transcriptome, 1KP | OQON |
| <i>Halochlorococcum marinum</i>        | Transcriptome, 1KP | ALZF |
| <i>Helicodictyon planctonicum</i>      | Transcriptome, 1KP | AJAU |
| <i>Ignatius tetrasporus</i>            | Transcriptome, 1KP | KADG |
| <i>Ochlochaete</i> sp.                 | Transcriptome, 1KP | CQQP |
| <i>Oltmannsiellopsis viridis</i>       | Transcriptome, 1KP | PZBH |
| <i>Oltmannsiellopsis viridis</i>       | Transcriptome, 1KP | QJYX |
| <i>Percursaria percursa</i>            | Transcriptome, 1KP | OAEZ |
| <i>Planophila laetevirens</i>          | Transcriptome, 1KP | CBNG |
| <i>Planophila</i> sp.                  | Transcriptome, 1KP | LETF |
| <i>Pirula salina</i>                   | Transcriptome, 1KP | NQYP |
| <i>Pseudoneochloris marina</i>         | Transcriptome, 1KP | GJIY |
| <i>Trentepohlia annulata</i>           | Transcriptome, 1KP | NATT |

### **Chlorophyceae**

|                                  |                    |      |
|----------------------------------|--------------------|------|
| <i>Ankistrodesmus</i> sp.        | Transcriptome, 1KP | OTQG |
| <i>Aphanochaete repens</i>       | Transcriptome, 1KP | IJMT |
| <i>Asteromonas gracilis</i>      | Transcriptome, 1KP | NTLE |
| <i>Botryosphaerella sudetica</i> | Transcriptome, 1KP | VJDZ |
| <i>Brachiomonas submarina</i>    | Transcriptome, 1KP | GUBD |
| <i>Carteria crucifera</i>        | Transcriptome, 1KP | VIAU |

|                                       |                                   |      |
|---------------------------------------|-----------------------------------|------|
| <i>Carteria obtusa</i>                | Transcriptome, 1KP                | RUIF |
| <i>Chaetopeltis orbicularis</i>       | Transcriptome, 1KP                | BAZF |
| <i>Chlamydomonas reinhardtii</i>      | Genome, Phytozome                 | -    |
| <i>Chlamydomonas bilatus</i>          | Transcriptome, 1KP                | MULF |
| <i>Chlamydomonas cribrum</i>          | Transcriptome, 1KP                | BCYF |
| <i>Chlamydomonas moewusii</i>         | Transcriptome, 1KP                | JRGZ |
| <i>Chlamydomonas noctigama</i>        | Transcriptome, 1KP                | VALZ |
| <i>Chlamydomonas sp.</i>              | Transcriptome, 1KP                | TSBQ |
| <i>Chlamydomonas sp.</i>              | Transcriptome, 1KP                | AOUJ |
| <i>Chlorella variabilis</i>           | Genome, Blanc et al. <sup>7</sup> | -    |
| <i>Chloromonas oogama</i>             | Transcriptome, 1KP                | IHOI |
| <i>Chloromonas perforata</i>          | Transcriptome, 1KP                | QRTH |
| <i>Chloromonas reticulata</i>         | Transcriptome, 1KP                | LBRP |
| <i>Chloromonas rosae</i>              | Transcriptome, 1KP                | AJUW |
| <i>Chloromonas subdivisa</i>          | Transcriptome, 1KP                | GFUR |
| <i>Chloromonas tughillensis</i>       | Transcriptome, 1KP                | UTRE |
| <i>Cylindrocapsa geminella</i>        | Transcriptome, 1KP                | DZPJ |
| <i>Dunaliella salina</i>              | Transcriptome, 1KP                | RHVC |
| <i>Dunaliella tertiolecta</i>         | Transcriptome, 1KP                | ZDIZ |
| <i>Eudorina elegans</i>               | Transcriptome, 1KP                | RNAT |
| <i>Fritschiella tuberosa</i>          | Transcriptome, 1KP                | VFIV |
| <i>Golenkinia longispicula</i>        | Transcriptome, 1KP                | BZSH |
| <i>Gonium pectorale</i>               | Transcriptome, 1KP                | KUJU |
| <i>Haematococcus pluvialis</i>        | Transcriptome, 1KP                | ODXI |
| <i>Haematococcus pluvialis</i>        | Transcriptome, 1KP                | AGIO |
| <i>Hafniomonas reticulata</i>         | Transcriptome, 1KP                | FXHG |
| <i>Heterochlamydomonas inaequalis</i> | Transcriptome, 1KP                | IRYH |
| <i>Lobochlamys segnis</i>             | Transcriptome, 1KP                | OFUE |
| <i>Lobomonas rostrata</i>             | Transcriptome, 1KP                | JKKI |
| <i>Microspora cf. tumidula</i>        | Transcriptome, 1KP                | FOYQ |
| <i>Neodesmus pupukensis</i>           | Transcriptome, 1KP                | MWAN |
| <i>Neochlorosarcina sp.</i>           | Transcriptome, 1KP                | USIX |
| <i>Oedogonium cardiacum</i>           | Transcriptome, 1KP                | DVYE |
| <i>Oedogonium foveolatum</i>          | Transcriptome, 1KP                | SDPC |
| <i>Oogamochlamys gigantea</i>         | Transcriptome, 1KP                | XDLL |
| <i>Pandorina morum</i>                | Transcriptome, 1KP                | RYJX |
| <i>Pediastrum duplex</i>              | Transcriptome, 1KP                | XKWQ |
| <i>Pediastrum duplex</i>              | Transcriptome, 1KP                | XTON |
| <i>Phacotus lenticularis</i>          | Transcriptome, 1KP                | ZIVZ |
| <i>Pleurastrum insigne</i>            | Transcriptome, 1KP                | PRIQ |
| <i>Pteromonas angulosa</i>            | Transcriptome, 1KP                | LNIL |
| <i>Pteromonas sp.</i>                 | Transcriptome, 1KP                | ACRY |

|                             |                                       |      |
|-----------------------------|---------------------------------------|------|
| Scenedesmus dimorphus       | Transcriptome, 1KP                    | PZIF |
| Spermatozopsis exsultans    | Transcriptome, 1KP                    | MXDS |
| Spermatozopsis similis      | Transcriptome, 1KP                    | ENAU |
| Stephanosphaera pluvialis   | Transcriptome, 1KP                    | ZLQE |
| Stigeoclonium helveticum    | Transcriptome, 1KP                    | JMUI |
| Uronema sp.                 | Transcriptome, 1KP                    | ISGT |
| Uronema belkae              | Transcriptome, 1KP                    | RAWF |
| Vitreochlamys sp.           | Transcriptome, 1KP                    | QWRA |
| Volvox carteri              | Genome, Phytozome                     | -    |
| Volvox aureus               | Transcriptome, 1KP                    | JWGT |
| Volvox aureus               | Transcriptome, 1KP                    | WRSL |
| Volvox globator             | Transcriptome, 1KP                    | ISPU |
| <b>Pedinophyceae</b>        |                                       |      |
| Pedinomonas minor           | Transcriptome, 1KP                    | RRSV |
| Pedinomonas tuberculata     | Transcriptome, 1KP                    | PUAN |
| <b>Red Algae</b>            |                                       |      |
| Betaphycus gelatinae        | Transcriptome, 1KP                    | BWVJ |
| Ceramium kondoi             | Transcriptome, 1KP                    | VZWX |
| Chondrus crispus            | Genome, Collen et al. <sup>8</sup>    | -    |
| Chondrus crispus            | Transcriptome, 1KP                    | UGPM |
| Chroodactylon ornatum       | Transcriptome, 1KP                    | LLXJ |
| Cyanidioschyzon merolae     | Genome, Matsuzaki et al. <sup>9</sup> | -    |
| Dumontia simplex            | Transcriptome, 1KP                    | IEHF |
| Eucheuma denticulatum       | Transcriptome, 1KP                    | JEBK |
| Galdieria sulphuraria       | Genome, Barbier et al. <sup>10</sup>  | -    |
| Glaucosphaera vacuolata     | Transcriptome, 1KP                    | RSOF |
| Gloeopeltis furcata         | Transcriptome, 1KP                    | SBLT |
| Gracilaria asiatica         | Transcriptome, 1KP                    | VNAL |
| Gracilaria blodgettii       | Transcriptome, 1KP                    | LJPN |
| Gracilaria chouae           | Transcriptome, 1KP                    | FTRP |
| Gracilaria lemaneiformi     | Transcriptome, 1KP                    | IKWM |
| Grateloupia filicina        | Transcriptome, 1KP                    | ZJOJ |
| Grateloupia livida          | Transcriptome, 1KP                    | IKIZ |
| Grateloupia turuturu        | Transcriptome, 1KP                    | URSB |
| Grateloupia chiangii        | Transcriptome, 1KP                    | PWKQ |
| Gymnogongrus ftabelliformis | Transcriptome, 1KP                    | CKXF |
| Heterosiphonia pulchra      | Transcriptome, 1KP                    | YSBD |
| Kappaphycus alvarezii       | Transcriptome, 1KP                    | IHJY |
| Mazzaella japonica          | Transcriptome, 1KP                    | WEJN |
| Polysiphonia japonica       | Transcriptome, 1KP                    | XAXW |
| Pyropia yezoensis           | Genome, Nakamura et al. <sup>11</sup> | -    |
| Porphyra yezoensis          | Transcriptome, 1KP                    | ZULJ |

|                                     |                                           |      |
|-------------------------------------|-------------------------------------------|------|
| Porphyridium cruentum               | Transcriptome, 1KP                        | OBUY |
| Porphyridium purpureum              | Genome, Bhattacharya et al. <sup>12</sup> | -    |
| Porphyridium purpureum              | Transcriptome, 1KP                        | PVGP |
| Rhodella violacea                   | Transcriptome, 1KP                        | RTLK |
| Rhodochaete parvula                 | Transcriptome, 1KP                        | JJZR |
| Sinotubimorpha guangdongensis       | Transcriptome, 1KP                        | PYDB |
| Symphocladia latiuscula             | Transcriptome, 1KP                        | UYFR |
| <b>Prasinophyte</b>                 |                                           |      |
| Monomastix opisthostigma            | Transcriptome, 1KP                        | BTFM |
| Pyramimonas parkeae                 | Transcriptome, 1KP                        | TNAW |
| Tetraselmis cordiformis             | Transcriptome, 1KP                        | DUMA |
| <b>Cryptophyte</b>                  |                                           |      |
| Chroomonas sp                       | Transcriptome, 1KP                        | ROZZ |
| Cryptomonas curvata                 | Transcriptome, 1KP                        | BAKF |
| Guillardia theta                    | Genome, Curtis et al. <sup>13</sup>       | -    |
| Hemiselmis virescens                | Transcriptome, 1KP                        | MJMQ |
| Rhodomonas sp                       | Transcriptome, 1KP                        | IAYV |
| <b>Glaucophyte</b>                  |                                           |      |
| Cyanophora paradoxa                 | Genome, Price et al. <sup>14</sup>        | -    |
| Cyanoptyche gloeocystis             | Transcriptome, 1KP                        | JKHA |
| Glaucocystis nostochinearum         | Transcriptome, 1KP                        | POOW |
| <b>Haptophytes</b>                  |                                           |      |
| Isochrysis sp.                      | Transcriptome, 1KP                        | BAJW |
| Pavlova lutheri                     | Transcriptome, 1KP                        | NMAK |
| Prymnesium parvum                   | Transcriptome, 1KP                        | LXRN |
| <b>Stramenopiles - Chrysophytes</b> |                                           |      |
| Mallomonas sp.                      | Transcriptome, 1KP                        | BOGT |
| Ochromonas sp.                      | Transcriptome, 1KP                        | EBWI |
| Synura petersenii                   | Transcriptome, 1KP                        | DBYD |
| Synura sp.                          | Transcriptome, 1KP                        | VKVG |
| <b>Stramenopiles - Brown algae</b>  |                                           |      |
| Ishige okamurae                     | Transcriptome, 1KP                        | APTP |
| Petalonia fascia                    | Transcriptome, 1KP                        | VRGZ |
| Scytosiphon lomentaria              | Transcriptome, 1KP                        | JCXF |

---

**Supplementary Table 2.** GenBank accessions of the phytochromes used in phylogenetic analyses. "-": not applicable.

| Phytochrome                      | Source                                        | 1KP <sup>3</sup> identifier | GenBank accession |
|----------------------------------|-----------------------------------------------|-----------------------------|-------------------|
| <b>Angiosperm PHYA</b>           |                                               |                             |                   |
| <i>Arabidopsis thaliana</i>      | Genome, Phytozome <sup>2</sup>                | -                           | -                 |
| <i>Fragaria vesca</i>            | Genome, Phytozome                             | -                           | -                 |
| <i>Phaseolus vulgaris</i> 1      | Genome, Phytozome                             | -                           | -                 |
| <i>Phaseolus vulgaris</i> 2      | Genome, Phytozome                             | -                           | -                 |
| <i>Cucumis sativus</i> 1         | Genome, Phytozome                             | -                           | -                 |
| <i>Cucumis sativus</i> 2         | Genome, Phytozome                             | -                           | -                 |
| <i>Vitis vinifera</i>            | Genome, Phytozome                             | -                           | -                 |
| <i>Solanum lycopersicum</i>      | Genome, Phytozome                             | -                           | -                 |
| <i>Buxus sempervirens</i>        | Transcriptome, 1KP <sup>2</sup>               | IWMW                        | KT071960          |
| <i>Aquilegia coerulea</i>        | Genome, Phytozome                             | -                           | -                 |
| <i>Oryza sativa</i>              | Genome, Phytozome                             | -                           | -                 |
| <i>Platanthera clavellata</i>    | Transcriptome, 1KP                            | MTHW                        | KT071961          |
| <i>Pistia stratioides</i>        | Transcriptome, 1KP                            | MFIN                        | KT071962          |
| <i>Laurelia sempervirens</i>     | Transcriptome, 1KP                            | WAIL                        | KT071963          |
| <i>Peperomia fraseri</i>         | Transcriptome, 1KP                            | XSZI                        | KT071964          |
| <i>Illicium floridanum</i>       | Transcriptome, 1KP                            | VZCI                        | KT071965          |
| <i>Amborella trichocarpa</i>     | Genome, Amborella Genome Project <sup>1</sup> | -                           | -                 |
| <b>Gymnosperm PHYN</b>           |                                               |                             |                   |
| <i>Cephalotaxus harringtonia</i> | Transcriptome, 1KP                            | WYAJ                        | KT071966          |
| <i>Podocarpus rubens</i>         | Transcriptome, 1KP                            | XLGK                        | KJ195161          |
| <i>Thuja plicata</i>             | Transcriptome, 1KP                            | VFYZ                        | KT071967          |
| <i>Taiwania cryptomerioides</i>  | Transcriptome, 1KP                            | QSNJ                        | KJ195162          |
| <i>Pinus parviflora</i>          | Transcriptome, 1KP                            | IIOL                        | KJ195163          |
| <i>Welwitschia mirabilis</i>     | Transcriptome, 1KP                            | TOXE                        | KJ195164          |
| <i>Gnetum montanum</i>           | Transcriptome, 1KP                            | GTHK                        | KJ195165          |
| <i>Ginkgo biloba</i>             | Transcriptome, 1KP                            | SGTW                        | KT071968          |
| <i>Encephalartos barteri</i>     | Transcriptome, 1KP                            | GNQG                        | KJ195166          |
| <b>Angiosperm PHYC</b>           |                                               |                             |                   |
| <i>Arabidopsis thaliana</i>      | Genome, Phytozome                             | -                           | -                 |
| <i>Fragaria vesca</i>            | Genome, Phytozome                             | -                           | -                 |
| <i>Cucumis sativus</i>           | Genome, Phytozome                             | -                           | -                 |
| <i>Vitis vinifera</i>            | Genome, Phytozome                             | -                           | -                 |
| <i>Solanum lycopersicum</i>      | Genome, Phytozome                             | -                           | -                 |
| <i>Buxus sempervirens</i>        | Transcriptome, 1KP                            | IWMW                        | KT071969          |
| <i>Aquilegia coerulea</i>        | Genome, Phytozome                             | -                           | -                 |
| <i>Oryza sativa</i>              | Genome, Phytozome                             | -                           | -                 |
| <i>Platanthera clavellata</i>    | Transcriptome, 1KP                            | MTHW                        | KT071970          |
| <i>Pistia stratioides</i>        | Transcriptome, 1KP                            | MFIN                        | KT071971          |
| <i>Laurelia sempervirens</i>     | Transcriptome, 1KP                            | WAIL                        | KT071972          |
| <i>Peperomia fraseri</i>         | Transcriptome, 1KP                            | XSZI                        | KT071973          |
| <i>Illicium floridanum</i>       | Transcriptome, 1KP                            | VZCI                        | KT071974          |
| <i>Amborella trichocarpa</i>     | Genome, Amborella Genome Project              | -                           | -                 |
| <b>Gymnosperm PHYO</b>           |                                               |                             |                   |
| <i>Podocarpus rubens</i>         | Transcriptome, 1KP                            | XLGK                        | KJ195167          |
| <i>Thuja plicata</i>             | Transcriptome, 1KP                            | VFYZ                        | KT071975          |
| <i>Taiwania cryptomerioides</i>  | Transcriptome, 1KP                            | QSNJ                        | KJ195168          |
| <i>Pinus parviflora</i>          | Transcriptome, 1KP                            | IIOL                        | KJ195169          |
| <i>Ginkgo biloba</i>             | Transcriptome, 1KP                            | SGTW                        | KT071976          |
| <i>Encephalartos barteri</i>     | Transcriptome, 1KP                            | GNQG                        | KJ195170          |



**Angiosperm PHYB**

|                               |                                  |      |          |
|-------------------------------|----------------------------------|------|----------|
| <i>Arabidopsis thaliana</i> D | Genome, Phytozome                | -    | -        |
| <i>Arabidopsis thaliana</i> B | Genome, Phytozome                | -    | -        |
| <i>Fragaria vesca</i>         | Genome, Phytozome                | -    | -        |
| <i>Phaseolus vulgaris</i>     | Genome, Phytozome                | -    | -        |
| <i>Cucumis sativus</i>        | Genome, Phytozome                | -    | -        |
| <i>Vitis vinifera</i>         | Genome, Phytozome                | -    | -        |
| <i>Solanum lycopersicum</i> 1 | Genome, Phytozome                | -    | -        |
| <i>Solanum lycopersicum</i> 2 | Genome, Phytozome                | -    | -        |
| <i>Buxus sempervirens</i>     | Transcriptome, 1KP               | IWMW | KT071977 |
| <i>Aquilegia coerulea</i>     | Genome, Phytozome                | -    | -        |
| <i>Oryza sativa</i>           | Genome, Phytozome                | -    | -        |
| <i>Platanthera clavellata</i> | Transcriptome, 1KP               | MTHW | KT071978 |
| <i>Pistia stratioides</i>     | Transcriptome, 1KP               | MFIN | KT071979 |
| <i>Laurelia sempervirens</i>  | Transcriptome, 1KP               | WAIL | KT071980 |
| <i>Peperomia fraseri</i>      | Transcriptome, 1KP               | XSZI | KT071981 |
| <i>Illicium floridanum</i>    | Transcriptome, 1KP               | VZCI | KT071982 |
| <i>Amborella trichocarpa</i>  | Genome, Amborella Genome Project | -    | -        |

**Angiosperm PHYE**

|                                 |                    |      |          |
|---------------------------------|--------------------|------|----------|
| <i>Arabidopsis thaliana</i>     | Genome, Phytozome  | -    | -        |
| <i>Fragaria vesca</i> 1         | Genome, Phytozome  | -    | -        |
| <i>Fragaria vesca</i> 2         | Genome, Phytozome  | -    | -        |
| <i>Phaseolus vulgaris</i>       | Genome, Phytozome  | -    | -        |
| <i>Cucumis sativus</i>          | Genome, Phytozome  | -    | -        |
| <i>Solanum lycopersicum</i>     | Genome, Phytozome  | -    | -        |
| <i>Capnoides sempervirens</i> 1 | Transcriptome, 1KP | AUGV | KT071983 |
| <i>Aquilegia coerulea</i> 1     | Genome, Phytozome  | -    | -        |
| <i>Capnoides sempervirens</i> 2 | Transcriptome, 1KP | AUGV | KT071984 |
| <i>Aquilegia coerulea</i> 2     | Genome, Phytozome  | -    | -        |
| <i>Laurelia sempervirens</i>    | Transcriptome, 1KP | WAIL | KT071985 |
| <i>Illicium floridanum</i>      | Transcriptome, 1KP | VZCI | KT071986 |

**Gymnosperm PHYP**

|                                  |                    |      |          |
|----------------------------------|--------------------|------|----------|
| <i>Thuja plicata</i>             | Transcriptome, 1KP | VFYZ | KT071987 |
| <i>Taiwania cryptomerioides</i>  | Transcriptome, 1KP | QSNJ | KJ195155 |
| <i>Cephalotaxus harringtonia</i> | Transcriptome, 1KP | WYAJ | KT071988 |
| <i>Podocarpus rubens</i>         | Transcriptome, 1KP | XLGK | KJ195156 |
| <i>Pinus parviflora</i>          | Transcriptome, 1KP | IIOL | KJ195157 |
| <i>Gnetum montanum</i>           | Transcriptome, 1KP | GTHK | KJ195158 |
| <i>Welwitschia mirabilis</i>     | Transcriptome, 1KP | TOXE | KJ195159 |
| <i>Ginkgo biloba</i>             | Transcriptome, 1KP | SGTW | KT071989 |
| <i>Encephalartos barteri</i>     | Transcriptome, 1KP | GNQG | KJ195160 |

**Fern PHY1**

|                                  |                                        |      |           |
|----------------------------------|----------------------------------------|------|-----------|
| <i>Equisetum diffusum</i>        | Transcriptome, 1KP                     | CAPN | KT071819  |
| <i>Marattia howeana</i>          | Cloning, this study                    | -    | KP872700  |
| <i>Osmunda</i> sp                | Transcriptome, 1KP                     | UOMY | KJ195150  |
| <i>Dipteris conjugata</i>        | Transcriptome, 1KP                     | MEKP | KT071820  |
| <i>Pilularia globulifera</i>     | Transcriptome, 1KP                     | KIIX | KJ195151  |
| <i>Plagiogyria japonica</i>      | Transcriptome, 1KP                     | UWOD | KJ195152  |
| <i>Adiantum capillus-veneris</i> | GenBank                                | -    | AB016151  |
| <i>Pteridium aquilinum</i>       | Transcriptome, Der et al. <sup>5</sup> | -    | SRX423244 |
| <i>Cystopteris protrusa</i>      | Transcriptome, 1KP                     | YOWV | KT071821  |
| <i>Blechnum spicant</i>          | Transcriptome, 1KP                     | VITX | KJ195153  |
| <i>Polypodium glycyrrhiza</i>    | Transcriptome, 1KP                     | CJNT | KJ195154  |

|                                    |                                            |      |           |
|------------------------------------|--------------------------------------------|------|-----------|
| <i>Asplenium platyneuron</i>       | Transcriptome, 1KP                         | KJZG | KT071822  |
| <i>Alsophila spinulosa</i>         | Transcriptome, 1KP                         | GANB | KT071823  |
| <i>Woodsia scopulina</i>           | Transcriptome, 1KP                         | YJJY | KT071824  |
| <i>Deparia lobato-crenata</i>      | Transcriptome, 1KP                         | FCHS | KT071825  |
| <i>Vittaria appalachiana</i>       | Transcriptome, 1KP                         | NDUV | KT071826  |
| <i>Danaea nodosa</i>               | Transcriptome, 1KP                         | DFHO | KT071827  |
| <i>Azolla filiculoides</i>         | Transcriptome, Brouwer et al. <sup>4</sup> | -    | -         |
| <i>Thyrsopteris elegans</i>        | Transcriptome, 1KP                         | EWXK | KT071828  |
| <i>Ceratopteris thalictroides</i>  | Transcriptome, 1KP                         | PIVW | KT071829  |
| <i>Lonchitis hirsuta</i>           | Transcriptome, 1KP                         | VVRN | KT071830  |
| <b>Fern PHY2/4</b>                 |                                            |      |           |
| <i>Equisetum diffusum</i> A        | Transcriptome, 1KP                         | CAPN | KJ195136  |
| <i>Equisetum diffusum</i> B        | Transcriptome, 1KP                         | CAPN | KT071831  |
| <i>Botrypus virginianus</i> A      | Transcriptome, 1KP                         | BEGM | KJ195137  |
| <i>Sceptridium dissectum</i> A     | Transcriptome, 1KP                         | EFAQ | KT071832  |
| <i>Botrypus virginianus</i> B      | Transcriptome, 1KP                         | BEGM | KT071833  |
| <i>Sceptridium dissectum</i> B     | Transcriptome, 1KP                         | EFAQ | KT071834  |
| <i>Psilotum nudum</i>              | GenBank                                    | QVMR | X74930    |
| <i>Marattia attenuata</i>          | Transcriptome, 1KP                         | UGNK | KT071835  |
| <i>Osmunda</i> sp A                | Transcriptome, 1KP                         | UOMY | KJ195138  |
| <i>Dipteris conjugata</i>          | Transcriptome, 1KP                         | MEKP | KJ195139  |
| <i>Danaea nodosa</i>               | Transcriptome, 1KP                         | DFHO | KT071836  |
| <i>Osmundastrum cinnamomeum</i> A  | Transcriptome, 1KP                         | RFMZ | KT071837  |
| <i>Osmunda javanica</i> A          | Transcriptome, 1KP                         | VIBO | KT071838  |
| <i>Osmundastrum cinnamomeum</i> B  | Transcriptome, 1KP                         | RFMZ | KT071839  |
| <i>Osmunda javanica</i> B          | Transcriptome, 1KP                         | VIBO | KT071840  |
| <b>Fern PHY2</b>                   |                                            |      |           |
| <i>Anemia tomentosa</i>            | Transcriptome, 1KP                         | CQPW | KJ195140  |
| <i>Pilularia globulifera</i>       | Transcriptome, 1KP                         | KIIX | KJ195142  |
| <i>Plagiogyria japonica</i>        | Transcriptome, 1KP                         | UWOD | KJ195141  |
| <i>Adiantum capillus-veneris</i>   | GenBank                                    | -    | AB016232  |
| <i>Pteridium aquilinum</i>         | Transcriptome, Der et al.                  | -    | SRX423244 |
| <i>Polystichum acrostichoides</i>  | Transcriptome, 1KP                         | FQGQ | KT071841  |
| <i>Cystopteris fragilis</i>        | Transcriptome, 1KP                         | LHLE | KT071842  |
| <i>Blechnum spicant</i>            | Transcriptome, 1KP                         | VITX | KJ195143  |
| <i>Leucostegia immersa</i>         | Transcriptome, 1KP                         | WGTV | KT071843  |
| <i>Polypodium hesperium</i>        | Transcriptome, 1KP                         | GYFU | KJ195144  |
| <i>Gymnocarpium dryopteris</i>     | Transcriptome, 1KP                         | HEGQ | KT071844  |
| <i>Homalosorus pycnocarpus</i>     | Transcriptome, 1KP                         | OCZL | KT071845  |
| <i>Athyrium filix-femina</i>       | Transcriptome, 1KP                         | AFPO | KT071846  |
| <i>Diplazium wichurae</i>          | Transcriptome, 1KP                         | UFJN | KT071847  |
| <i>Deparia lobato-crenata</i>      | Transcriptome, 1KP                         | FCHS | KT071848  |
| <i>Asplenium platyneuron</i>       | Transcriptome, 1KP                         | KJZG | KT071849  |
| <i>Woodsia scopulina</i>           | Transcriptome, 1KP                         | YJJY | KT071850  |
| <i>Woodsia ilvensis</i>            | Transcriptome, 1KP                         | YQEC | KT071851  |
| <i>Vittaria appalachiana</i>       | Transcriptome, 1KP                         | NDUV | KT071852  |
| <i>Pityrogramma trifoliata</i>     | Transcriptome, 1KP                         | UJTT | KT071853  |
| <i>Pteris ensiformis</i>           | Transcriptome, 1KP                         | FLTD | KT071854  |
| <i>Myriopteris rufa</i>            | Transcriptome, 1KP                         | GSXD | KT071855  |
| <i>Gaga arizonica</i>              | Transcriptome, 1KP                         | DCDT | KT071856  |
| <i>Argyrochosma nivea</i>          | Transcriptome, 1KP                         | XDDT | KT071857  |
| <i>Notholaena montieliae</i>       | Transcriptome, 1KP                         | YCKE | KT071858  |
| <i>Cryptogramma acrostichoides</i> | Transcriptome, 1KP                         | WQML | KT071859  |

|                                       |                           |      |              |
|---------------------------------------|---------------------------|------|--------------|
| <i>Thyrsopteris elegans</i>           | Transcriptome, 1KP        | EWXK | KT071860     |
| <i>Culcita macrocarpa</i>             | Transcriptome, 1KP        | PNZO | KT071861     |
| <i>Lindsaea microphylla</i>           | Transcriptome, 1KP        | YIXP | KT071862     |
| <i>Lonchitis hirsuta</i>              | Transcriptome, 1KP        | VVRN | KT071863     |
| <i>Ceratopteris thalictroides</i>     | Transcriptome, 1KP        | PIVW | KT071864     |
| <b>Fern PHY4A</b>                     |                           |      |              |
| <i>Plagiogyria japonica</i>           | Transcriptome, 1KP        | UWOD | KJ195145     |
| <i>Pilularia globulifera</i>          | Transcriptome, 1KP        | KIIX | KJ195146     |
| <i>Adiantum tenerum</i>               | Transcriptome, 1KP        | BMJR | KJ195147     |
| <i>Polystichum acrostichoides</i>     | Transcriptome, 1KP        | FQGQ | KT071865     |
| <i>Cystopteris fragilis</i>           | Transcriptome, 1KP        | LHLE | KT071866     |
| <i>Blechnum spicant</i>               | Transcriptome, 1KP        | VITX | KJ195148     |
| <i>Leucostegia immersa</i>            | Transcriptome, 1KP        | WGTV | KT071867     |
| <i>Polypodium hesperium</i>           | Transcriptome, 1KP        | GYFU | KJ195149     |
| <i>Adiantum capillus-veneris</i>      | GenBank                   | -    | AB003364     |
| <i>Asplenium platyneuron</i>          | Transcriptome, 1KP        | KJZG | KT071868     |
| <i>Gaga arizonica</i>                 | Transcriptome, 1KP        | DCDT | KT071869     |
| <i>Myriopteris rufa</i>               | Transcriptome, 1KP        | GSXD | KT071870     |
| <i>Argyrochosma nivea</i>             | Transcriptome, 1KP        | XDDT | KT071871     |
| <i>Vittaria appalachiana</i>          | Transcriptome, 1KP        | NDUV | KT071872     |
| <i>Pteris ensiformis</i>              | Transcriptome, 1KP        | FLTD | KT071873     |
| <i>Cryptogramma acrostichoides</i>    | Transcriptome, 1KP        | WQML | KT071874     |
| <i>Alsophila spinulosa</i>            | Transcriptome, 1KP        | GANB | KT071875     |
| <i>Azolla caroliniana</i>             | Transcriptome, 1KP        | CVEG | KT071876     |
| <i>Lonchitis hirsuta</i>              | Transcriptome, 1KP        | VVRN | KT071877     |
| <i>Ceratopteris thalictroides</i>     | Transcriptome, 1KP        | PIVW | KT071878     |
| <i>Anemia tomentosa A</i>             | Transcriptome, 1KP        | CQPW | KT071879     |
| <i>Anemia tomentosa B</i>             | Transcriptome, 1KP        | CQPW | KT071880     |
| <i>Lindsaea microphylla</i>           | Transcriptome, 1KP        | YIXP | KT071881     |
| <i>Lygodium japonicum</i>             | Transcriptome, 1KP        | PBUU | KT071882     |
| <i>Thyrsopteris elegans</i>           | Transcriptome, 1KP        | EWXK | KT071883     |
| <b>Fern PHY4B</b>                     |                           |      |              |
| <i>Pteridium aquilinum</i>            | Transcriptome, Der et al. | -    | SRX423244    |
| <i>Cystopteris fragilis</i>           | Transcriptome, 1KP        | LHLE | KT071884     |
| <i>Blechnum spicant</i>               | Transcriptome, 1KP        | VITX | KT071885     |
| <i>Polystichum acrostichoides</i>     | Transcriptome, 1KP        | FQGQ | KT071886     |
| <i>Gymnocarpium dryopteris</i>        | Transcriptome, 1KP        | HEGQ | KT071887     |
| <i>Woodsia ilvensis</i>               | Transcriptome, 1KP        | YQEC | KT071888     |
| <i>Athyrium filix-femina</i>          | Transcriptome, 1KP        | AFPO | KT071889     |
| <i>Diplazium wichuriae</i>            | Transcriptome, 1KP        | UFJN | KT071890     |
| <b>Isoetopsida PHY</b>                |                           |      |              |
| <i>Selaginella cf pallescens</i>      | Transcriptome, 1KP        | ABIJ | KT071891     |
| <i>Selaginella moellendorffii</i>     | Genome, Phytozome         | -    | XM_002991595 |
| <i>Selaginella willdenowii</i>        | Transcriptome, 1KP        | KJYC | KT071892     |
| <i>Selaginella kraussiana</i>         | Transcriptome, 1KP        | ZFGK | KT071893     |
| <i>Selaginella wallacei</i>           | Transcriptome, 1KP        | JKAA | KJ195172     |
| <i>Selaginella apoda</i>              | Transcriptome, 1KP        | LGDQ | KT071894     |
| <i>Isoetes tegetiformans</i>          | Transcriptome, 1KP        | PKOX | KJ195171     |
| <b>Lycopodiales PHY1</b>              |                           |      |              |
| <i>Dendrolycopodium obscurum</i>      | Transcriptome, 1KP        | XNXF | KJ195173     |
| <i>Huperzia selago</i>                | Transcriptome, 1KP        | GTUO | KJ195174     |
| <i>Pseudolycopodiella caroliniana</i> | Transcriptome, 1KP        | UPMJ | KT071895     |
| <b>Lycopodiales PHY2</b>              |                           |      |              |

|                                       |                    |      |              |
|---------------------------------------|--------------------|------|--------------|
| <i>Dendrolycopodium obscurum</i>      | Transcriptome, 1KP | XNXF | KJ195175     |
| <i>Huperzia lucidula</i>              | Transcriptome, 1KP | GKAG | KJ195176     |
| <i>Pseudolycopodiella caroliniana</i> | Transcriptome, 1KP | UPMJ | KT071896     |
| <b>Moss PHY1_3</b>                    |                    |      |              |
| <i>Andreaea rupestris</i>             | Transcriptome, 1KP | WOGB | KT071897     |
| <i>Rhynchostegium serrulatum</i>      | Transcriptome, 1KP | JADL | KT071898     |
| <i>Aulacomnium heterostichum</i>      | Transcriptome, 1KP | WNGH | KT071899     |
| <i>Hedwigia ciliata</i>               | Transcriptome, 1KP | YWNF | KJ195194     |
| <i>Philonotis fontana</i>             | Transcriptome, 1KP | ORKS | KT071900     |
| <i>Ceratodon purpureus</i> A          | GenBank            | -    | U72993       |
| <i>Ceratodon purpureus</i> B          | GenBank            | -    | U87632       |
| <i>Leucobryum albidum</i>             | Transcriptome, 1KP | VMXJ | KT071901     |
| <i>Physcomitrella patens</i> 1        | Genome, Phytozome  | -    | XM_001765983 |
| <i>Physcomitrella patens</i> 3        | Genome, Phytozome  | -    | XM_001778103 |
| <i>Racomitrium varium</i>             | Transcriptome, 1KP | RDOO | KT071902     |
| <i>Leucodon julaceus</i>              | Transcriptome, 1KP | IGUH | KT071903     |
| <i>Leucodon brachypus</i>             | Transcriptome, 1KP | ZACW | KT071904     |
| <i>Pseudotaxiphyllum elegans</i>      | Transcriptome, 1KP | QKQO | KT071905     |
| <i>Neckera douglasii</i>              | Transcriptome, 1KP | TMAJ | KT071906     |
| <i>Stereodon subimponens</i>          | Transcriptome, 1KP | LNSF | KT071907     |
| <i>Loeskeobryum brevirostre</i>       | Transcriptome, 1KP | WSPM | KT071908     |
| <i>Cladopodium rostratum</i>          | Transcriptome, 1KP | VBMM | KJ195193     |
| <i>Bryum argenteum</i>                | Transcriptome, 1KP | JMXW | KJ195195     |
| <b>Moss PHY2_4/5</b>                  |                    |      |              |
| <i>Andreaea rupestris</i>             | Transcriptome, 1KP | WOGB | KT071909     |
| <i>Sphagnum palustre</i>              | Transcriptome, 1KP | RCBT | KT071910     |
| <i>Takakia lepidozoides</i>           | Transcriptome, 1KP | SKQD | KT071911     |
| <b>Moss PHY2_4</b>                    |                    |      |              |
| <i>Atrichum angustatum</i>            | Transcriptome, 1KP | ZTHV | KT071912     |
| <i>Physcomitrella patens</i> 4        | Genome, Phytozome  | -    | XM_001773498 |
| <i>Physcomitrella patens</i> 2        | Genome, Phytozome  | -    | XM_001782287 |
| <i>Rhynchostegium serrulatum</i>      | Transcriptome, 1KP | JADL | KT071913     |
| <i>Aulacomnium heterostichum</i>      | Transcriptome, 1KP | WNGH | KT071914     |
| <i>Hedwigia ciliata</i>               | Transcriptome, 1KP | YWNF | KJ195190     |
| <i>Philonotis fontana</i>             | Transcriptome, 1KP | ORKS | KT071915     |
| <i>Ceratodon purpureus</i>            | Transcriptome, 1KP | FFPD | KT071916     |
| <i>Leucobryum albidum</i>             | Transcriptome, 1KP | VMXJ | KT071917     |
| <i>Racomitrium varium</i>             | Transcriptome, 1KP | RDOO | KT071918     |
| <i>Scouleria aquatica</i>             | Transcriptome, 1KP | BPSG | KT071919     |
| <i>Bryum argenteum</i>                | Transcriptome, 1KP | JMXW | KJ195191     |
| <i>Loeskeobryum brevirostre</i>       | Transcriptome, 1KP | WSPM | KT071920     |
| <i>Neckera douglasii</i>              | Transcriptome, 1KP | TMAJ | KT071921     |
| <i>Cladopodium rostratum</i>          | Transcriptome, 1KP | VBMM | KJ195189     |
| <i>Leucodon brachypus</i>             | Transcriptome, 1KP | ZACW | KT071922     |
| <i>Leucodon julaceus</i>              | Transcriptome, 1KP | IGUH | KT071923     |
| <i>Pseudotaxiphyllum elegans</i>      | Transcriptome, 1KP | QKQO | KT071924     |
| <i>Anomodon attenuatus</i>            | Transcriptome, 1KP | QMWB | KT071925     |
| <i>Stereodon subimponens</i>          | Transcriptome, 1KP | LNSF | KT071926     |
| <b>Moss PHYS</b>                      |                    |      |              |
| <i>Atrichum angustatum</i>            | Transcriptome, 1KP | ZTHV | KT071927     |
| <i>Physcomitrella patens</i> A        | Genome, Phytozome  | -    | XM_001761093 |
| <i>Physcomitrella patens</i> B        | Genome, Phytozome  | -    | XM_001767172 |
| <i>Physcomitrella patens</i> C        | Genome, Phytozome  | -    | XM_001754314 |

|                               |                                 |      |          |
|-------------------------------|---------------------------------|------|----------|
| Rhynchostegium serrulatum D   | Transcriptome, 1KP              | JADL | KT071928 |
| Aulacomnium heterostichum D   | Transcriptome, 1KP              | WNGH | KT071929 |
| Hedwigia ciliata D            | Transcriptome, 1KP              | YWNF | KT071930 |
| Philonotis fontana D          | Transcriptome, 1KP              | ORKS | KT071931 |
| Leucobryum albidum D          | Transcriptome, 1KP              | VMXJ | KT071932 |
| Ceratodon purpureus D         | GenBank                         | -    | AY123149 |
| Scouleria aquatica D          | Transcriptome, 1KP              | BPSG | KT071933 |
| Racomitrium varium D          | Transcriptome, 1KP              | RDOO | KT071934 |
| Syntrichia princeps D         | Transcriptome, 1KP              | GRKU | KT071935 |
| Bryum argenteum D             | Transcriptome, 1KP              | JMXW | KJ195187 |
| Leucodon brachypus D          | Transcriptome, 1KP              | ZACW | KT071936 |
| Anomodon attenuatus D         | Transcriptome, 1KP              | QMWB | KT071937 |
| Cladopodium rostratum D       | Transcriptome, 1KP              | VBMM | KJ195185 |
| Loeskeobryum brevirostre D    | Transcriptome, 1KP              | WSPM | KT071938 |
| Pseudotaxiphyllum elegans D   | Transcriptome, 1KP              | QKQO | KT071939 |
| Racomitrium varium E          | Transcriptome, 1KP              | RDOO | KT071940 |
| Scouleria aquatica E          | Transcriptome, 1KP              | BPSG | KT071941 |
| Syntrichia princeps E         | Transcriptome, 1KP              | GRKU | KT071942 |
| Hedwigia ciliata E            | Transcriptome, 1KP              | YWNF | KJ195186 |
| Philonotis fontana E          | Transcriptome, 1KP              | ORKS | KT071943 |
| Leucobryum albidum E          | Transcriptome, 1KP              | VMXJ | KT071944 |
| Ceratodon purpureus E         | GenBank                         | -    | EU122393 |
| Rhynchostegium serrulatum E   | Transcriptome, 1KP              | JADL | KT071945 |
| Aulacomnium heterostichum E 1 | Transcriptome, 1KP              | WNGH | KT071946 |
| Aulacomnium heterostichum E 2 | Transcriptome, 1KP              | WNGH | KT071947 |
| Anomodon attenuatus E         | Transcriptome, 1KP              | QMWB | KT071948 |
| Neckera douglasii E           | Transcriptome, 1KP              | TMAJ | KT071949 |
| Pseudotaxiphyllum elegans E   | Transcriptome, 1KP              | QKQO | KT071950 |
| Cladopodium rostratum E       | Transcriptome, 1KP              | VBMM | KJ195184 |
| Loeskeobryum brevirostre E    | Transcriptome, 1KP              | WSPM | KT071951 |
| Leucodon julaceus E           | Transcriptome, 1KP              | IGUH | KT071952 |
| Leucodon brachypus E          | Transcriptome, 1KP              | ZACW | KT071953 |
| <b>Liverwort PHY</b>          |                                 |      |          |
| Scapania nemorosa             | Transcriptome, 1KP              | IRBN | KJ195177 |
| Porella pinnata               | Transcriptome, 1KP              | UUHD | KJ195178 |
| Schistochila sp               | Transcriptome, 1KP              | LGOW | KJ195179 |
| Metzgeria crassipilis         | Transcriptome, 1KP              | NRWZ | KJ195180 |
| Pellia neesiana               | Transcriptome, 1KP              | JHFI | KJ195181 |
| Odontoschisma prostratum      | Transcriptome, 1KP              | YBQN | KT071954 |
| Marchantia paleacea           | GenBank                         | -    | AB022917 |
| Conocephalum conicum          | Transcriptome, 1KP              | ILBQ | KJ195182 |
| Lunularia cruciata            | Transcriptome, 1KP              | TXVB | KT071955 |
| Sphaerocarpos texanus         | Transcriptome, 1KP              | HERT | KJ195183 |
| Ricciocarpos natans           | Transcriptome, 1KP              | WJLO | KT071956 |
| Bazzania trilobata            | Transcriptome, 1KP              | WZYK | KT071957 |
| <b>Hornwort PHY</b>           |                                 |      |          |
| Nothoceros aenigmaticus       | Cloning, Li et al. <sup>6</sup> | DXOU | KJ128384 |
| Megaceros flagellaris         | Transcriptome, 1KP              | UCRN | KJ195197 |
| Paraphymatoceros hallii       | Transcriptome, 1KP              | FAJB | KJ195198 |
| Phaeoceros carolinianus       | Transcriptome, 1KP              | WCZB | KJ195199 |
| Anthoceros punctatus          | Genome, Li et al. <sup>6</sup>  | -    | KJ195038 |
| Phaeomegaceros coriaceus      | Transcriptome, 1KP              | AKXB | KT071958 |
| Leiosporoceros dussii         | Transcriptome, 1KP              | ANON | KT071959 |

**Hornwort NEO**

|                         |                    |      |          |
|-------------------------|--------------------|------|----------|
| Nothoceros aenigmaticus | Transcriptome, 1KP | DXOU | KJ128382 |
| Megaceros flagellaris   | Transcriptome, 1KP | UCRN | KJ195132 |
| Paraphymatoceros hallii | Transcriptome, 1KP | FAJB | KJ194999 |
| Phaeoceros carolinianus | Transcriptome, 1KP | WCZB | KJ194998 |
| Anthoceros punctatus    | Cloning, Li et al. | -    | KJ194997 |

**Fern NEO**

|                           |                    |   |          |
|---------------------------|--------------------|---|----------|
| Adiantum capillus-veneris | GenBank            | - | AB012082 |
| Dipteris conjugata        | Cloning, Li et al. | - | KJ195011 |
| Blechnum spicant          | Cloning, Li et al. | - | KJ195007 |
| Hemidictyum marginatum    | Cloning, Li et al. | - | KJ195037 |

**Zygnematales NEO**

|                              |                    |      |          |
|------------------------------|--------------------|------|----------|
| Mougeotia scalaris 1         | GenBank            | -    | AB206961 |
| Mougeotia scalaris 2         | GenBank            | -    | AB206962 |
| Cylindrocystis brebissonii 1 | Transcriptome, 1KP | YOXI | KJ195042 |
| Cylindrocystis sp 1          | Transcriptome, 1KP | VAZE | KJ195043 |
| Cylindrocystis brebissonii 2 | Transcriptome, 1KP | YOXI | KJ195044 |
| Cylindrocystis sp 2          | Transcriptome, 1KP | VAZE | KJ195041 |
| Zygnemopsis sp               | Transcriptome, 1KP | MFZO | KJ195039 |

**Desmidiales PHY2C**

|                            |                    |      |          |
|----------------------------|--------------------|------|----------|
| Desmidium aptogonum        | Transcriptome, 1KP | DFDS | KT071990 |
| Onychonema laeve           | Transcriptome, 1KP | GGWH | KT071991 |
| Cosmarium granatum 1       | Transcriptome, 1KP | MNNM | KT071992 |
| Stauroidesmus convergens 1 | Transcriptome, 1KP | WCQU | KT071993 |
| Cosmarium subtumidum       | Transcriptome, 1KP | WDGV | KT071994 |
| Stauroidesmus convergens 2 | Transcriptome, 1KP | WCQU | KT071995 |
| Cosmarium granatum 2       | Transcriptome, 1KP | MNNM | KT071996 |
| Phymatodocis nordstedtiana | Transcriptome, 1KP | RPQV | KT071997 |
| Penium exiguum             | Transcriptome, 1KP | YSQT | KT071998 |
| Gonatozygon kinahanii 1    | Transcriptome, 1KP | KEYW | KT071999 |
| Gonatozygon kinahanii 2    | Transcriptome, 1KP | KEYW | KT072000 |

**Desmidiales PHY2B**

|                            |                    |      |          |
|----------------------------|--------------------|------|----------|
| Desmidium aptogonum        | Transcriptome, 1KP | DFDS | KT072001 |
| Onychonema laeve           | Transcriptome, 1KP | GGWH | KT072002 |
| Cosmarium subtumidum       | Transcriptome, 1KP | WDGV | KT072003 |
| Stauroidesmus convergens   | Transcriptome, 1KP | WCQU | KT072004 |
| Phymatodocis nordstedtiana | Transcriptome, 1KP | RPQV | KT072005 |
| Penium exiguum             | Transcriptome, 1KP | YSQT | KT072006 |
| Gonatozygon kinahanii      | Transcriptome, 1KP | KEYW | KT072007 |

**Desmidiales PHY2A**

|                            |                    |      |          |
|----------------------------|--------------------|------|----------|
| Desmidium aptogonum        | Transcriptome, 1KP | DFDS | KT072008 |
| Cosmarium subtumidum       | Transcriptome, 1KP | WDGV | KT072009 |
| Cosmarium granatum         | Transcriptome, 1KP | MNNM | KT072010 |
| Onychonema laeve           | Transcriptome, 1KP | GGWH | KT072011 |
| Stauroidesmus convergens   | Transcriptome, 1KP | WCQU | KT072012 |
| Phymatodocis nordstedtiana | Transcriptome, 1KP | RPQV | KT072013 |
| Penium exiguum             | Transcriptome, 1KP | YSQT | KT072014 |
| Gonatozygon kinahanii      | Transcriptome, 1KP | KEYW | KT072015 |
| Roya obtusa                | Transcriptome, 1KP | XRTZ | KJ195200 |
| Planotaenium ohtanii       | Transcriptome, 1KP | SNOX | KJ195201 |

**Zygnematales PHY2**

|                      |                    |      |          |
|----------------------|--------------------|------|----------|
| Mougeotia scalaris   | Genbank            | -    | AB206965 |
| Mesotaenium kramstae | Transcriptome, 1KP | NBYP | KT072016 |

|                               |                    |      |          |
|-------------------------------|--------------------|------|----------|
| Mesotaenium caldariorum       | Genbank            | -    | U31283   |
| Zygnemopsis sp                | Transcriptome, 1KP | MFZO | KJ195202 |
| Cylindrocystis sp             | Transcriptome, 1KP | VAZE | KJ195203 |
| Cylindrocystis brebissonii    | Transcriptome, 1KP | YOXI | KJ195204 |
| Mesotaenium braunii           | Transcriptome, 1KP | WSJO | KJ195205 |
| Netrium digitus               | Transcriptome, 1KP | FFGR | KT072017 |
| <b>Coleochaetales PHY2</b>    |                    |      |          |
| Coleochaete irregularis       | Transcriptome, 1KP | QPDY | KJ195206 |
| Chaetosphaeridium globosum    | Transcriptome, 1KP | DRGY | KJ195207 |
| <b>Klebsormidiales PHY2</b>   |                    |      |          |
| Interfilum paradoxum          | Transcriptome, 1KP | FPCO | KJ195208 |
| Klebsormidium subtile         | Transcriptome, 1KP | FQLP | KJ195209 |
| Entransia fimbriata           | Transcriptome, 1KP | BFIK | KJ195210 |
| <b>Desmidiales PHY1</b>       |                    |      |          |
| Cosmarium granatum            | Transcriptome, 1KP | MNNM | KT072018 |
| Cosmarium subtumidum          | Transcriptome, 1KP | WDGV | KT072019 |
| Staurodesmus convergens       | Transcriptome, 1KP | WCQU | KT072020 |
| Onychonema laeve              | Transcriptome, 1KP | GGWH | KT072021 |
| Phymatodocis nordstedtiana    | Transcriptome, 1KP | RPQV | KT072022 |
| Penium exiguum                | Transcriptome, 1KP | YSQT | KT072023 |
| Gonatozygon kinahanii         | Transcriptome, 1KP | KEYW | KT072024 |
| Roya obtusa                   | Transcriptome, 1KP | XRTZ | KT072025 |
| Planotaenium ohtanii          | Transcriptome, 1KP | SNOX | KT072026 |
| <b>Klebsormidiales PHY1</b>   |                    |      |          |
| Entransia fimbriata           | Transcriptome, 1KP | BFIK | KT072027 |
| <b>Mesostigmatales PHY1/2</b> |                    |      |          |
| Mesostigma viride             | Transcriptome, 1KP | KYIO | KT072028 |
| Chlorokybus atmophyticus 1    | Transcriptome, 1KP | AZZW | KT072029 |
| Chlorokybus atmophyticus 2    | Transcriptome, 1KP | AZZW | KT072030 |
| Spirotaenia minuta            | Transcriptome, 1KP | NNHQ | KT072031 |
| <b>Zygnematales PHYX2</b>     |                    |      |          |
| Zygnemopsis sp                | Transcriptome, 1KP | MFZO | KT072032 |
| Cylindrocystis cushleckae     | Transcriptome, 1KP | JOJQ | KT072033 |
| Mesotaenium kramstae          | Transcriptome, 1KP | NBYP | KT072034 |
| Netrium digitus               | Transcriptome, 1KP | FFGR | KT072035 |
| <b>Coleochaetales PHYX2</b>   |                    |      |          |
| Coleochaete irregularis       | Transcriptome, 1KP | QPDY | KT072036 |
| Chaetosphaeridium globosum    | Transcriptome, 1KP | DRGY | KT072037 |
| <b>Zygnematales PHYX1</b>     |                    |      |          |
| Zygnemopsis sp                | Transcriptome, 1KP | MFZO | KT072038 |
| Mesotaenium kramstae          | Transcriptome, 1KP | NBYP | KT072039 |
| Cylindrocystis cushleckae     | Transcriptome, 1KP | JOJQ | KT072040 |
| Cylindrocystis brebissonii    | Transcriptome, 1KP | YOXI | KT072041 |
| Cylindrocystis sp             | Transcriptome, 1KP | VAZE | KT072042 |
| Netrium digitus               | Transcriptome, 1KP | FFGR | KT072043 |
| <b>Coleochaetales PHYX1</b>   |                    |      |          |
| Coleochaete irregularis       | Transcriptome, 1KP | QPDY | KT072044 |
| <b>Prasinophyte PHY</b>       |                    |      |          |
| Monomastix opisthostigma      | Transcriptome, 1KP | BTFM | -        |
| Pyramimonas parkeae           | Transcriptome, 1KP | TNAW | -        |
| Tetraselmis cordiformis       | Transcriptome, 1KP | DUMA | -        |
| Dolichomastix tenuilepsis     | GenBank            | -    | KF876183 |
| Tetraselmis astigmatica       | GenBank            | -    | KF876182 |

|                                          |                                              |      |              |
|------------------------------------------|----------------------------------------------|------|--------------|
| Prasinoderma coloniale                   | GenBank                                      | -    | KF876180     |
| Nephroselmis pyriformis                  | GenBank                                      | -    | KF876181     |
| Micromonas pusilla                       | GenBank                                      | -    | KF754357     |
| <b>Cryptophyte PHY</b>                   |                                              |      |              |
| Hemiselmis virescens                     | Transcriptome, 1KP                           | MJMQ | KT013280     |
| Cryptomonas curvata                      | Transcriptome, 1KP                           | BAKF | KT013281     |
| Rhodomonas sp                            | Transcriptome, 1KP                           | IAYV | KT013282     |
| Guillardia theta 1                       | Genome, Curtis et al. <sup>13</sup>          | -    | -            |
| Guillardia theta 2                       | Genome, Curtis et al.                        | -    | -            |
| Chroomonas sp                            | Transcriptome, 1KP                           | ROZZ | KT013283     |
| Guillardia theta PEK1                    | Genome, Curtis et al.                        | -    | -            |
| Guillardia theta PEK2                    | Genome, Curtis et al.                        | -    | -            |
| Guillardia theta PEK3                    | Genome, Curtis et al.                        | -    | -            |
| <b>Glaucophyte PHY</b>                   |                                              |      |              |
| Cyanophora paradoxa 1                    | Genome, Price et al. <sup>14</sup>           | -    | KF597305     |
| Cyanophora paradoxa 2                    | Genome, Price et al.                         | -    | KF615870     |
| Cyanophora paradoxa 4                    | Genome, Price et al.                         | -    | -            |
| Gloeochaete wittrockiana GPS2            | Transcriptome, Duanmu et al. <sup>15</sup>   | -    | -            |
| Gloeochaete wittrockiana GPS4            | Transcriptome, Duanmu et al.                 | -    | -            |
| Gloeochaete wittrockiana GPS3            | Transcriptome, Duanmu et al.                 | -    | -            |
| Gloeochaete wittrockiana GPS1            | Transcriptome, Rockwell et al. <sup>16</sup> | -    | KF894953     |
| Cyanoptychae gloeocystis 1               | Transcriptome, 1KP                           | JKHA | KT013284     |
| Cyanoptychae gloeocystis 2               | Transcriptome, 1KP                           | JKHA | KT013285     |
| Cyanoptychae gloeocystis 3               | Transcriptome, 1KP                           | JKHA | KT013286     |
| Glaucozystis nostochinearum 1            | Transcriptome, 1KP                           | POOW | KT013287     |
| Glaucozystis nostochinearum 2            | Transcriptome, 1KP                           | POOW | KT013288     |
| Glaucozystis nostochinearum 3            | Transcriptome, 1KP                           | POOW | KT013289     |
| Glaucozystis nostochinearum 4            | Transcriptome, 1KP                           | POOW | KT013290     |
| <b>Diatom PHY</b>                        |                                              |      |              |
| Thalassiosira pseudonana                 | GenBank                                      | -    | XM_002290775 |
| Phaeodactylum tricornutum                | GenBank                                      | -    | XM_002179026 |
| <b>Brown algae PHY</b>                   |                                              |      |              |
| Petalonia fascia                         | Transcriptome, 1KP                           | VRGZ | KT003814     |
| Scytosiphon lomentaria                   | Transcriptome, 1KP                           | JCXF | KT003815     |
| Ishige okamurai                          | Transcriptome, 1KP                           | APTP | KT003816     |
| Ectocarpus siliculosus                   | GenBank                                      | -    | FN649030     |
| Feldmannia species virus isolate FsV     | GenBank                                      | -    | EU916176     |
| Ectocarpus siliculosus virus isolate EsV | GenBank                                      | -    | AF204951     |
| <b>Fungi PHY</b>                         |                                              |      |              |
| Aspergillus fumigatus                    | GenBank                                      | -    | DS499603     |
| Ustilago maydis                          | GenBank                                      | -    | AACP01000210 |
| Cochliobolus heterostrophus              | GenBank                                      | -    | AY456024     |
| Neurospora crassa 1                      | GenBank                                      | -    | BK004087     |
| Neurospora crassa 2                      | GenBank                                      | -    | DQ128077     |
| Penicillium marneffeii                   | GenBank                                      | -    | XM_002144684 |
| <b>Cyanobacteria PHY</b>                 |                                              |      |              |
| Microcystis aeruginosa                   | GenBank                                      | -    | AP009552     |
| Nodularia spumigena                      | GenBank                                      | -    | AAVW01000039 |
| Synechocystis sp                         | GenBank                                      | -    | BA000022     |
| Anabaena variabilis                      | GenBank                                      | -    | NC_007413    |
| Cyanothece sp                            | GenBank                                      | -    | ABVE01000001 |
| Nostoc sp                                | GenBank                                      | -    | BA000019     |
| Tolypothrix sp 1                         | GenBank                                      | -    | AF309559     |



|                                   |         |   |              |
|-----------------------------------|---------|---|--------------|
| Tolypothrix sp 2                  | GenBank | - | AF309560     |
| <b>Cyanobacteria PAS-less PHY</b> |         |   |              |
| Microcoleus chthonoplastes        | GenBank | - | DS989848     |
| Lyngbya sp                        | GenBank | - | AAVU01000002 |
| Nostoc punctiforme                | GenBank | - | CP001037     |
| Anabaena variabilis               | GenBank | - | CP000117     |
| Synechococcus sp                  | GenBank | - | ABD00881     |
| <b>Bacteria PHY</b>               |         |   |              |
| Agrobacterium tumefaciens         | GenBank | - | C58AE007869  |
| Pseudomonas aeruginosa            | GenBank | - | CH482383     |
| Pseudomonas syringae              | GenBank | - | AE016853     |
| Ralstonia pickettii               | GenBank | - | CP001068     |
| Stenotrophomonas maltophilia      | GenBank | - | AM743169     |
| Rhodopseudomonas palustris        | GenBank | - | BX572602     |
| Oceanicola granulosus             | GenBank | - | AAOT01000028 |
| Methylocella silvestris           | GenBank | - | CP001280     |
| Sclerotinia sclerotiorum          | GenBank | - | CH476645     |
| Magnetospirillum magnetotacticum  | GenBank | - | AAAP01003476 |

---

## Supplementary references

- <sup>1</sup>Amborella Genome Project. The *Amborella* genome and the evolution of flowering plants. *Science* **342**, 1241089 (2013).
- <sup>2</sup>Goodstein, D. M. *et al.* Phytozome: a comparative platform for green plant genomics. *Nucleic Acids Res.* **40**, D1178–86 (2012).
- <sup>3</sup>Matasci, N. *et al.* Data access for the 1,000 Plants (1KP) project. *GigaScience* **3**, 17 (2014).
- <sup>4</sup>Brouwer, P. *et al.* *Azolla* domestication towards a biobased economy? *New Phytol* **202**, 1069–1082 (2014).
- <sup>5</sup>Der, J. P., Barker, M. S., Wickett, N. J., Depamphilis, C. W. & Wolf P. G. De novo characterization of the gametophyte transcriptome in bracken fern, *Pteridium aquilinum*. *BMC Genomics* **12**, 99 (2011).
- <sup>6</sup>Li, F.-W. *et al.* Horizontal transfer of an adaptive chimeric photoreceptor from bryophytes to ferns. *Proc. Natl. Acad. Sci. USA* **111**, 6672–6677 (2014).
- <sup>7</sup>Blanc, G. *et al.* The *Chlorella variabilis* NC64A genome reveals adaptation to photosymbiosis, coevolution with viruses, and cryptic sex. *Plant Cell* **22**, 2943–2955 (2010).
- <sup>8</sup>Collen, J. *et al.* Genome structure and metabolic features in the red seaweed *Chondrus crispus* shed light on evolution of the Archaeplastida. *Proc. Natl. Acad. Sci. USA* **110**, 5247–5252 (2013).
- <sup>9</sup>Matsuzaki, M. *et al.* Genome sequence of the ultrasmall unicellular red alga *Cyanidioschyzon merolae* 10D. *Nature* **428**, 653–657 (2004).
- <sup>10</sup>Barbier, G. *et al.* Comparative genomics of two closely related unicellular thermo-acidophilic red algae, *Galdieria sulphuraria* and *Cyanidioschyzon merolae*, reveals the molecular basis of the metabolic flexibility of *Galdieria sulphuraria* and significant differences in carbohydrate metabolism of both algae. *Plant Physiology* **137**, 460–474 (2005).
- <sup>11</sup>Nakamura, Y. *et al.* The first symbiont-free genome sequence of marine red alga, *Susabi-nori* (*Pyropia yezoensis*). *PLoS ONE* **8**, e57122 (2013).
- <sup>12</sup>Bhattacharya, D. *et al.* Genome of the red alga *Porphyridium purpureum*. *Nat Comms* **4**, 1941 (2013).
- <sup>13</sup>Curtis, B. A. *et al.* Algal genomes reveal evolutionary mosaicism and the fate of nucleomorphs. *Nature* **492**, 59–65 (2012).
- <sup>14</sup>Price, D. C. *et al.* *Cyanophora paradoxa* genome elucidates origin of photosynthesis in algae and plants. *Science* **335**, 843–847 (2012).
- <sup>15</sup>Duanmu, D. *et al.* Marine algae and land plants share conserved phytochrome signaling systems. *Proc. Natl. Acad. Sci. USA* **111**, 15827–15832 (2014).
- <sup>16</sup>Rockwell, N. C. *et al.* Eukaryotic algal phytochromes span the visible spectrum. *Proc. Natl. Acad. Sci. USA* **111**, 3871–3876 (2014).
